# Supplementary material for: Genome sequence of the cauliflower mushroom Sparassis crispa (Hanabiratake) and its association with beneficial usage
Source: PubMed Central journal article supplement (PMC6207663; doi:10.1038/s41598-018-34415-6), 2018-10-30
Supplement: 41598_2018_34415_MOESM1_ESM.pdf [file 41598_2018_34415_MOESM1_ESM.pdf]

## **Genome sequence of the cauliflower mushroom *Sparassis crispa* (Hanabiratake) and its association with beneficial usage**

Ryoiti Kiyama <sup>1\*</sup>, Yoshiyuki Furutani <sup>2</sup>, Kayoko Kawaguchi <sup>2</sup>, Toshio Nakanishi <sup>2</sup>

<sup>1</sup> Dept. of Life Science, Faculty of Life Science, Kyushu Sangyo Univ., 2-3-1 Matsukadai, Higashi-ku, Fukuoka 813-8503, Japan.

<sup>2</sup> Dept. of Pediatric Cardiology, Tokyo Women's Medical Univ., 8-1, Kawada-cho, Shinjuku-ku, Tokyo 162-8666, Japan.

Correspondence and requests for materials should be addressed to R. K. (email: kiyama.r@ip.kyusan-u.ac.jp)

### **Supplementary Information**

**Figure S1. Variation of glycoside hydrolases (GHs).** See Fig. 4 for details.

**Figure S2. Nucleotide sequences and deduced amino acid sequences of *S. crispa*  $\beta$ -glucan synthases.**

Nucleotide sequences of *S. crispa*  $\beta$ -glucan synthase genes, *ScrFKS1* (a) and *ScrFKS2* (b), and the deduced amino acid sequences are shown. The transmembrane domains predicted by TMHMM are shadowed, the regions homologous to FKS1 domains and glucan synthases predicted by Pfam are indicated by solid or dashed lines, respectively (a and b), and the potential *N*-glycosylation sites predicted by ScanProsite are boxed (a and b). The exon-intron junctions are shown by triangles (a and b).

**Figure S3. Biosynthetic gene clusters in the *S. crispa* genome.**

The genes with predicted functions are: core biosynthetic genes (■), additional biosynthetic genes (■), transport-related genes (■), regulatory genes (■) and other genes (■).

**Figure S4. Results of Gene Ontology classification.**

**Figure S5. Results of KEGG pathway classification.**

**Table S1. Assembly statistics.**

**Table S2. Gene model statistics.**

**Table S3. List of protein domains found in the genes of *S. crispa*.**

**Table S4. Resources of the other 25 fungi for OrthoMCL analysis.**

**Table S5.** The loci of matA and matB genes.

**Table S6.** Distribution of CAZyme genes in *S. crista* and the other 25 fungi.

**Table S7.** Identification of type I and type II  $\beta$ -glucan synthase genes in *S. crista*.

**Table S8.** List of biosynthetic gene clusters in the *S. crista* genome.

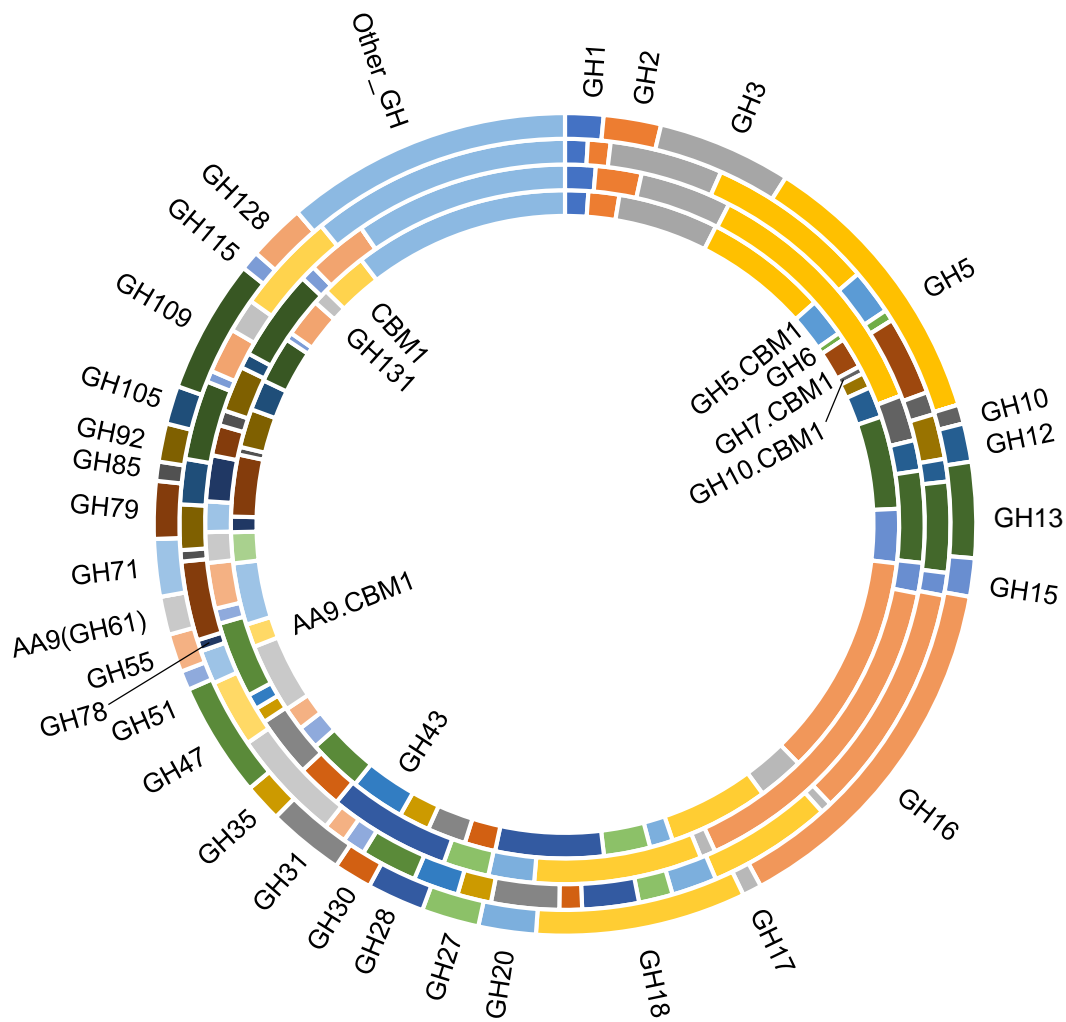

Fig. S1.

**Fig. S2. Nucleotide sequences and deduced amino acid sequences of *S. crispa*  $\beta$ -glucan synthases.**

Nucleotide sequences of *S. crispa*  $\beta$ -glucan synthase genes, *ScrFKS1* (a) and *ScrFKS2* (b), and the deduced amino acid sequences are shown. The transmembrane domains predicted by TMHMM are shadowed; the regions homologous to FKS1 domains and glucan synthases predicted by Pfam are indicated by solid or hatched lines, respectively (a and b); and the potential *N*-glycosylation sites predicted by ScanProsite, are boxed (a and b). The exon-intron junctions are shown by triangles (a and b).

(a)

```
1   ATGGCTGGTCGCCCCGGTCCACCTCGCAGCCATGAGGGCATCTACGTTTCCCGCTCGCCT
1   M A G R P G P P R S H E G I Y V S R S P
61  TCTTCTGATCCCCACGATCCCTTTCAGCAACGGGCAAGCGGCGGACGCACAGAGGTACTAC
21  S S D P H D P F S N G Q A A D A Q R Y Y
121 GATAACGACTCTGACAACATG GCCGTCGCGACACCTACATGTCAGACGGCAGCAATACT
41  D N D S D N Y G R R D T Y M S D G S N T
181 GGTCTGAATGAGGAGGATCGCTATTACGACAATAATGGTTACGATGCGTACACGCAACCC
61  G L N E E D R Y Y D N N G Y D A Y T Q P
241 GATACCGATTTCGAGGTTGATGTGTACGGCCAGAAATATGCACCCTCTGCCGAATCGCTG
81  D T D S E V D V Y G Q K Y A P S A E S L
301 GGCCCCCTCGCATGGGTCTTTT CAGAAGCATCTACTCCCACCTTTTGTGCGACCAGAATGGC
101 G P P R M G L S E A S T P T F V D Q N G
361 GGTCTCCAGGCTCACGCGAGCCGTACCCTGCGTGGACATCGGAAAGACAAATTCCTTG
121 G P P G S R E P Y P A W T S E R Q I P L
421 TCGAAGGAGGAGATTGAGGACATTTTTCTCGACCTGACCCAGAAGTTTCGGCTTCCAACGA
141 S K E E I E D I F L D L T Q K F G F Q R
481 GACTCCATGCGCAACATGTTTCGACTTCACCATGCAGCTGCTGGACAGTCGTGCCTCCCGC
161 D S M R N M F D F T M Q L L D S R A S R
541 ATGTCGCCAAATCAAGCCCTTCTCAGCTGCACGCAGACTACATCGGTGGTCAGCATGCC
181 M S P N Q A L L T L H A D Y I G G Q H A
601 AACTACCGCAAGTGGTACTTCGCTGCGCAGCTTGACCTCGACGATGCAGTCGGGCACACA
201 N Y R K W Y F A A Q L D L D D A V G H T
661 CAAAATCCTGGTCTGCAACGCCTGAAGTCGACGAAACGTGGTGGCCATAGGAACAATTCA
221 Q N P G L Q R L K S T K R G G H R N N S
721 GAGAAGTCGCTTAATAGTGCATGGACCGATGGCGGCAGGCGATGAACAACATGAGCCAG
241 E K S L N S A M D R W R Q A M N N M S Q
781 TATGATCGCATGCGCCAGATCGCGCTCTTTCTGCTGTGCTGGGGAGAAGCCGCACAGGTG
261 Y D R M R Q I A L F L L C W G E A A Q V
841 CGGTTCTGTGCCGAGTGTCTCTGCTTCATCTTCAAGTGTGCGGATGATTATTATCGGTGC
281 R F V P E C L C F I F K C A D D Y Y R S
```

901 CCGGAGTGT CAGAACAAGATCGATCCGGTGCCTGAGAGCTTGTACCTTCGTACCATCGTC  
 301 P E C Q N K I D P V P E S L Y L R T I V  
 961 AAGCCTTTGTATACGTTTCATTCGGGACCAGGGATATGAGGTAGTCGATGGGAAGTTTCGTC  
 321 K P L Y T F I R D Q G Y E V V D G K F V  
 1021 CGCCGGGAGAAGGATCACGAGAGCATCATCGGTTATGACGACGTCAATCAGCTCTTCTGG  
 341 R R E K D H E S I I G Y D D V N Q L F W  
 1081 TACCCGGAGGGCATTGCTCGTATTGTACTAACCGACAAGACTCGGTTGGTTGATCTGCCG  
 361 Y P E G I A R I V L T D K T R L V D L P  
 1141 CCCGCGCAACGATTTCATGAAGTTTGTAGCGAATCGACTGGAACCGTGTGTTCTTCAAGACG  
 381 P A Q R F M K F E R I D W N R V F F K T  
 1201 TACTACGAGAAGCGATCGTTTGGACACCTGTTGGTCAACTTCAATCGGATCTGGGTCATT  
 401 Y Y E K R S F G H L L V N F N R I W V I  
 1261 CACATCGCCATGTACTGGTTCTATACGGCGTACAACCTCGCCGACCATCTATAATGGGCAG  
 421 H I A M Y W F Y T A Y N S P T I Y N G Q  
 1321 AACTCTTCAGCGATGAGATGGAGTGCACAGCTCTCGGTGGTGGGTTGCGACAATAATT  
 441 N S S A M R W S A T A L G G A V A T I I  
 1381 ATGATTGCCGCTACACTGGCCGAATTCTCGTACATCCCCACCACCTGGAACAACACTTCT  
 461 M I A A T L A E F S Y I P T T W N N T S  
 1441 CACCTTACCCGGCGTTTACTTTTCTCATCGTCACGTTGGCTCTCACGGGTGGGCCGACA  
 481 H L T R R L L F L I V T L A L T G G P T  
 1501 ATCTATGTCGCGATCGCAGAGAACTCGTCACCTGGCGGGTGGTGGCGCTCATCCTCGGT  
 501 I Y V A I A E N S S P G G S L A L I L G  
 1561 ATTGTCCAGTTCTTCATCTCTGTCGTCGCCACTCTCCTCTTCGCCATTGTCCCATCAGGT  
 521 I V Q F F I S V V A T L L F A I V P S G  
 1621 CGTATGTTCCGGTGATAGAGTTGCCGGCAAGTCGCGGAAGTACCTCGCCAGCCAGACCTTC  
 541 R M F G D R V A G K S R K Y L A S Q T F  
 1681 ACGGCGAGCTACCCGTCCCTTAAGGCTACCCGCGCCTCGCTTCCGTGGCACTCTGGTTT  
 561 T A S Y P S L K A T A R L A S V A L W F  
 1741 CTCGTCTTCGGCTGCAAGTTCACCGAGTCGTA TCTTCTCCTCACGCTATCGTTCCAGGGT  
 581 L V F G C K F T E S Y F F L T L S F Q G  
 1801 CCGATCCGCGTTATGGTGGGTATGAAAATCCAGAATTGCGGCGATAAATATTTTCGGCAAT  
 601 P I R V M V G M K I Q N C G D K Y F G N  
 1861 GCTCTCTGTCGGAATCAGGCCGCGTTCGCTCTCACGATCATGTACATCATGGACCTGGTG  
 621 A L C R N Q A A F A L T I M Y I M D L V  
 1921 CTGTTCTTCTCGGATAACGTTCTTGTGGTGGATTATCTGGAACACGGTGGCCAGCATCGCG  
 641 L F F L D T F L W W I I W N T V A S I A  
 1981 CGCTCGTTCTACCTTGGATTATCGATCTGGACCCCATGGAAGACATCTACACTCGTTTG  
 661 R S F Y L G L S I W T P W K D I Y T R L

2041 CCCAAGCGCATCTATGCGAAGTTGCTCGCTACTGCCGATATGGAAGCGAAGTATAAGCCC  
 681 P K R I Y A K L L A T A D M E A K Y K P  
 2101 AAGGTCCTGGTCTCGCAAATCTGGAACGCGATCATTATTTCCATGTACCGCGAGCACTTG  
 701 K V L V S Q I W N A I I I S M Y R E H L  
 2161 CTCTCCATTGACCATGTCCAGAAGTTGCTATATCATCAGGTAGACGTTGGCCAAGACGGC  
 721 L S I D H V Q K L L Y H Q V D V G Q D G  
 2221 CGCCGCGAGCTGCGTGTCCCCGTTCTTTATTTACAGAGCGACAAGGGGTTCAAGGGC  
 741 R R S L R A P P F F I S Q S D K G F K G  
 2281 GAGTTCTTCACGCCCGAAGCGAGGCGGAGCGCGAATTTCTGTTCTTCGCTCAATCACTC  
 761 E F F T P G S E A E R R I S F F A Q S L  
 2341 ACAACTGCTGTTCCGGAGCCTCTACCTGTCGATGCTATGCCACGTTCCACCGTCTGACG  
 781 T T A V P E P L P V D A M P T F T V L T  
 2401 CCTCATTATAGCGAGAAGATCCTTCTTTTTCATTGAGAGAGATCATTTCGCGAAGAGGATCAG  
 801 P H Y S E K I L L S L R E I I R E E D Q  
 2461 AATACCCGAGTTACTCTCTTGAATACCTCAAACAGCTGCACCCCGTCAATGGGACAAT  
 821 N T R V T L L E Y L K Q L H P V E W D N  
 2521 TTCGTCGAAGGATACCAAGATCCTCGCCGAGGAGTCAACCATGTACAACGGCCCGAACCCC  
 841 F V K D T K I L A E E S T M Y N G P N P  
 2581 TTCGGTTCGACGAGAAGGGTCAGTCAAAGACCGATGATCTGCCTTTCTATTGCATTGGT  
 861 F G S D E K G Q S K T D D L P F Y C I G  
 2641 TTCAAGAGTGCCGCCCCGAATTCCTCTGCGGACACGTATTTGGGCGTCTCTCCGTGCA  
 881 F K S A A P E F T L R T R I W A S L R A  
 2701 CAGACCCTTACCCTACCGTGTCTGGCATGATGAACTACTCTAAAGCGATTAAGCTACTC  
 901 Q T L Y R T V S G M M N Y S K A I K L L  
 2761 TACCGTGTGCGAGAACCCCGAGGTCGTTTCAGCTCTTCGGCGCAACACAGACAAGCTGGAG  
 921 Y R V E N P E V V Q L F G G N T D K L E  
 2821 CGCGAAGTGAACGCATGGCTCGTTCGCAAATTCAAATTCGTCGTTTCGATGCAGCGTTAC  
 941 R E L E R M A R R K F K F V V S M Q R Y  
 2881 TCCAAGTTC AACCGCGAGGAGCAAGAGAACCGAGTTTCTCCTTCGCGCTTATCCTGAT  
 961 S K F N R E E Q E N A E F L L R A Y P D  
 2941 CTCCAGATCGCCTACCTTGAGGAGGAGCCCGCACGCAAGGAAGGTGGCGAAGTCCGACTA  
 981 L Q I A Y L E E E P A R K E G G E V R L  
 3001 TTCTCTGCGCTCATCGATGGTCATTCCGAGTTTATCCCTGAGACGGGACGTCGTCGCCCC  
 1001 F S A L I D G H S E F I P E T G R R R P  
 3061 AAGTTCCGATTGAGCTCCCTGGTAACCCAATTCTCGGCGACGGCAAGTCGGACAACCAG  
 1021 K F R I E L P G N P I L G D G K S D N Q  
 3121 AACCACGCGATCATCTTCTATCGTGGCGAATACCTGCAGCTCATCGATGCCAACCAGGAT  
 1041 N H A I I F Y R G E Y L Q L I D A N Q D

3181 AACTACCTGGAGGAGTGTCTGAAGATCCGCAACGTGCTTGGCGAGTTCGAAGAGTACGCC  
 1061 N Y L E E C L K I R N V L G E F E E Y A  
 3241 GTCTCCAGCCAGAGCCCTTACGCTCAGTGGGGTACAAGGAATTCAAGAAGAACCCCGTC  
 1081 V S S Q S P Y A Q W G H K E F K K N P V  
 3301 GCTATTGTTGGTGC GCGAGTACATCTTCTCCGAGAACATCGGTATTCTGGGTGATTTG  
 1101 A I V G A R E Y I F S E N I G I L G D L  
 3361 GCGGCTGGCAAGGAACAGACATTTCGGTACGCTCACGGCGCGCTCGCTGGCATGGATTGGG  
 1121 A A G K E Q T F G T L T A R S L A W I G  
 3421 GGCAAGCTTCACTATGGCCACCCCGATTTCTCAACGCGATCTACATGAACACGCGCGGT  
 1141 G K L H Y G H P D F L N A I Y M N T R G  
 3481 GGTGTCTCCAAGGCGCAGAAGGGTCTGCACTTGAACGAGGATATCTATGCTGGTATGACC  
 1161 G V S K A Q K G L H L N E D I Y A G M T  
 3541 GCGTTTGGCCGCGGTGGACGAATCAAACATACGGAGTACTATCAGTGC GGGAAAAGGTCCG  
 1181 A F G R G G R I K H T E Y Y Q C G K G R  
 3601 GACCTTGGGTTCGGCACCATTTCTGAACTTCCAGACGAAGATCGGTACCGGTATGGGCGAA  
 1201 D L G F G T I L N F Q T K I G T G M G E  
 3661 CAGATGCTCAGTCGCGAGTACTACTACCTCGGGACTCAGCTCCCTATCGACCGCTTCTCT  
 1221 Q M L S R E Y Y Y L G T Q L P I D R F L  
 3721 ACGTTCTACTACGGCCACCCCGGTTTCCACATCCATAACATGCTCGTCATCCTCTCGGTG  
 1241 T F Y Y G H P G F H I H N M L V I L S V  
 3781 CAGATCTTCATCACGACAATGGTGTACTTGGGAACGCTCAAGGGCCAACCTCACATTGTGC  
 1261 Q I F I T T M V Y L G T L K G Q L T L C  
 3841 CAGTACACTTCAAATGGTGTCTTCTCTCGGTCCTACAGGATGCTATAACCTCCAACCTGTG  
 1281 Q Y T S N G V S L G P T G C Y N L Q P V  
 3901 TTCCAGTGGATCAATCGCTGTATCATCAGTATCTTTTTAGTGTTCCTGATCGCGTACCTG  
 1301 F Q W I N R C I I S I F L V F L I A Y L  
 3961 CCACTTTTCTTGAAGAAGTGGTTCGAGCGCGGAACATAAAAAGCCATCCTCCGCTGACG  
 1321 P L F L Q E L V E R G T I K A I L R L T  
 4021 AAGCACTTCAGCTCAGCATCGCCTGCCTTCGAGGTCTTTTCAACGCGTATCTCTTCCCAT  
 1341 K H F S S A S P A F E V F S T R I S S H  
 4081 TCCATCGCCACCAATTTAACGTTTGGTGGCGCTCGGTACATCGCGACAGGCCGTGGTTTT  
 1361 S I A T N L T F G G A R Y I A T G R G F  
 4141 GCTACTACGAGGATCTCCTTCAGCATTCTCTACTCACGTTTCGCTGGCCCTAGTATATAT  
 1381 A T T R I S F S I L Y S R F A G P S I Y  
 4201 CTTGGCATGAGGACGCTCGTGATGCTACTCTATGTCACACTGACGTTGTGGACCGGTTGG  
 1401 L G M R T L V M L L Y V T L T L W T G W  
 4261 ATTATCTACTTCTGGTTCTCCACCCTGTCTTTGTATCTCGCCATTCTTGTTC AACCCG  
 1421 I I Y F W F S T L S L C I S P F L F N P

4321 CATCAATTCTCGTTCGCCGATTTTCATTGTGGACTATAGGGAGTTCTGCGTTGGATGAAT  
1441 H Q F S F A D F I V D Y R E F L R W M N  
4381 CGCGGTAACCTCGCGAGTGCACCAGAACCTCGTGGATCGGTTACTGCCGTCTTTCACGTACC  
1461 R G N S R V H Q N S W I G Y C R L S R T  
4441 ATGATCACTGGGTACAAGAAGAAGAACTCGGACACCCTTCAGAGAAGCTCTCGGGCGAC  
1481 M I T G Y K K K K L G H P S E K L S G D  
4501 GTTCCCCGGGCAGGTTGGCGCGCTGTGATGTTTTCGGAGATCATCTTCCCCACCGTTATG  
1501 V P R A G W R A V M F S E I I F P T V M  
4561 GCTGTCCTGATGGTGGTTGCCTACATCTTTGTCAAGTCTTCCCCGTCGACGCGAGAAAA  
1521 A V L M V V A Y I F V K S F P V D A R K  
4621 GAGCCACCAAACGCTCTTATTCGTATCGCGATTGTGTCCATCGGACCAATTTGTGGAAT  
1541 E P P N A L I R I A I V S I G P I L W N  
4681 GCGGCTATCCTCTTTTTACTATTCTGGTATCCTTGTTCTGGGCCACTGCTGGACACG  
1561 A A I L F L L F L V S L F L G P L L D T  
4741 CCCTACCCGAAGTTCGGTTCGTTTCATGGCCTTCCTTGCTCACTCGTTGGGTGTCATCGGC  
1581 P Y P K F G S F M A F L A H S L G V I G  
4801 ACGATTGGTTTCTTTGAGTTCCTGTGGTTCCTTGAGTTATGGAACGTTCTCACGCAGTG  
1601 T I G F F E F L W F L E L W N V P H A V  
4861 CTGGGTCTCATCGCCGTATCTACATTCAACGAGCGATCAACAAGGTGCTCATTGCGGTC  
1621 L G L I A V I Y I Q R A I N K V L I A V  
4921 TTCCTGTCTCGGGAATTCAAGCAGCAGAGACGAACCGCGCCTGGTGGACAGGAAAATGG  
1641 F L S R E F K H D E T N R A W W T G K W  
4981 TACGGTTCGCGGTCTGGGCTCGCAGCTATGTCCAACCAGCGCGGAGTTCATCGTGAAG  
1661 Y G R G L G S H A M S Q P A R E F I V K  
5041 ATCATCGAGCTTTCGCTCTGGAGTTCAGATTTCTCACTGGTCACTTCTGCTGTTTCATT  
1681 I I E L S L W S S D F L T G H F L L F I  
5101 TTGACCCCAACAAATCCTCATACTTACATTGATCGCGCTCATTCCATGATGCTGTTCTGG  
1701 L T P P I L I P Y I D R A H S M M L F W  
5161 TTACGTCCTTCGAAACAAATTCGTGCACCTCTGTACTCTATCAAACAGAAGCGGCAGCGC  
1721 L R P S K Q I R A P L Y S I K Q K R Q R  
5221 CGCTGGATCGTCATCAAATACGGCACCGTCTACGTCCTATCCATTGCTTGCTTTGCTGCC  
1741 R W I V I K Y G T V Y V L S I A C F A A  
5281 CTGATTGCTCTTCTCTCGTATTACGAGACGAGCTGCACTTCACGTGCGGCATCTGCCAG  
1761 L I A L P L V L R D E L H F T C G I C Q  
5341 ACGATCTAG  
1781 T I \*



(b)

1 ATGGCTGCCCCGACCCGGCTATGGTCTACAAAACCCGTTTCGCTGGTGGGACTTCCCCATAC  
1 M A A R P G Y G L Q N P F A G G T S P Y  
61 GGTCCACCTTTGCGTCAGTATTCCAACGATTCCGACCCCGGCGATCCCTATAGTAGTCGT  
21 G P P L R Q Y S N D S D P G D P Y S S R  
121 AATGCCAGTAGTGTCCCTTTGACACAGGCTGGATACGATGGTCAATCCACTCTATCTACA  
41 N A S S V P L T Q A G Y D G Q S T L S T  
181 GCCAGCACCGACGATGTGAACGAATACGACCGCCATTATAGCGCATCTGTGGACTCACAC  
61 A S T D D V N E Y D R H Y S A S V D S H  
241 ATGAGTGGTAGCTCAAGCGCACACGCTCCTTACAACCCGTTCTCTGATATACCTGGCTCC  
81 M S G S S S A H A P Y N P F S D I P G S  
301 CATGAGCCGTATCCTGCTTGGTCGGCAGAGCGCCAGATACCCATGTGACAGAAGAGATA  
101 H E P Y P A W S A E R Q I P M S T E E I  
361 GAAGATATATTTCTGGATCTCGCGCAGAAATTTGGTTTCCAGAGGGATTCCATGCGGAAC  
121 E D I F L D L A Q K F G F Q R D S M R N  
421 N ATGTTGCACTTCTCATGCATCTCCTCGATTCCCGAGCTTCGCGCATGACACCGAACAA  
141 M F D F L M H L L D S R A S R M T P N Q  
481 GCTCTCCTCACTGTCCATGCTGATTATATTGGCGGTCAACACGCGAACTACCGCAAGTGG  
161 A L L T V H A D Y I G G Q H A N Y R K W  
541 TACTTTGCAGCGCAACTCAACCTAGACGATGCAGTGGGACAGTCACAAAACCCCGGCCTT  
181 Y F A A Q L N L D D A V G Q S Q N P G L  
601 CAGCGCCTTCGTAGCGTCAAAGGCAAACCTTAGCACAGCCAGCACGAAGTCACTTGATAGC  
201 Q R L R S V K G K L S T A S T K S L D S  
661 GCACTAAACAGATGGCGGAACGCCATGAACAACATGAGCCAGTATGACCGCCTGCGCCAG  
221 A L N R W R N A M N N M S Q Y D R L R Q  
721 GTAGCACTTTACCTTCTGTGCTGGGCTGAAGCAGGCAACGTACGTTTTACCCCGAATGT  
241 V A L Y L L C W A E A G N V R F T P E C  
781 CTGTGTTTCATCTTCAAGTGCGCAGACGACTACTACCGGAGTCCGGAGTGCCAGAACAGA  
261 L C F I F K C A D D Y Y R S P E C Q N R  
841 GTGGATCCTGTTCCGGAGGGACTGTACCTGGAAGCCGTAATCAAGCCCATCTACAGGTTC  
281 V D P V P E G L Y L E A V I K P I Y R F  
901 ATGCGTGATCAGGGCTACGAAGTGTTGAAGGGAAGTTCGTCAGAAGAGAAAAGGATCAC  
301 M R D Q G Y E V V E G K F V R R E K D H  
961 GATCAGATCATTGGTTACGACGACATTAACCAGCTATTCTGGTACCCCGAAGGAATTGCA  
321 D Q I I G Y D D I N Q L F W Y P E G I A  
1021 AAGATTGCCTGCAAGACAATACGCGGCTCATTGACATTCCACCCGCTCAACGTTTCAGC  
341 K I V L Q D N T R L I D I P P A Q R F T  
1081 AAATTCGGGAAGATTGCCTGGAATCGTGTGTTCTTCAAGACCTACTTCGAGAGGCGATCT

361 K F G K I A W N R V F F K T Y F E R R S  
1141 ATCGCCACCTTTTGGTCAACTTCAATCGTATCTGGATCTTACACGTCGCGGTATATTGG  
381 I A H L L V N F N R I W I L H V A V Y W  
1201 TTCTATACCGCCTTTAATTCACCGAAAGTGTATGCACCGTACAAGAAGGCAGCTCCTTCT  
401 F Y T A F N S P K V Y A P Y K K A A P S  
1261 GCGGCCATGACTTGGTCTGCGACGGCACTTGGCGGCGCGGTTGCTACCGCAATCATGATT  
421 A A M T W S A T A L G G A V A T A I M I  
1321 GCTGCGACACTGGCCGAGTTTGCCTACATCCCAACAACATGGAATAACGCGTCCCATCTT  
441 A A T L A E F A Y I P T T W N N A S H L  
1381 ACGACTAGGCTCATATTCTTAGTCATCGTCTGGCGCTCACCGGAGGTCCCACCGTGTAT  
461 T T R L I F L V I V L A L T G G P T V Y  
1441 ATTGCCATGGTTAACGATTCGGCGTCGCACACACCGCTCATCGTCGGAATTGTACAGTTC  
481 I A M V N D S A S H T P L I V G I V Q F  
1501 TTCGTTTCCGTCGTTGCCACGGTGGCCTTCGGTGTATTCCATCTGGTCGCATGTTTGGT  
501 F V S V V A T V A F G V I P S G R M F G  
1561 GATCGGGTCGCGGGCAAGTCGCGCAAATATATGGCATCGCAGACGTTTACAGCGTCTTAC  
521 D R V A G K S R K Y M A S Q T F T A S Y  
1621 CCTGGTTTGAGCGTTGCCGCCGTTTGGGGTCTATCTCTCTATGGTCATTGGTCTTCGGC  
541 P G L S V A A R L G S I S L W S L V F G  
1681 TGCAAGTTTGTGGAATCATACTTCTTCTTGACGTCCTCTTTCAGTAGTCCCATTGCCGTG  
561 C K F V E S Y F F L T S S F S S P I A V  
1741 ATGGCCCGCACAACGGTGCAGGTTGTAGCGATAAGTTGTTTCGGTACAGCCCTTTGTTCG  
581 M A R T T V Q G C S D K L F G T A L C S  
1801 AATCAAGTGCCATTTCGCGCTCGCAATCATGTACGTGATGGACCTAGTGCTGTTCTTCTG  
601 N Q V P F A L A I M Y V M D L V L F F L  
1861 GACACGTACCTCTGGTACATCATCTGGGTGGTGGTGTTTAGTGTCTCCCGCTCCTTCTAT  
621 D T Y L W Y I I W V V V F S V S R S F Y  
1921 CTCGGTCTGTGATTTGGACGCCCTGGAAAGAGGTATATACCAGGATGCCGAAGAGGATC  
641 L G L S I W T P W K E V Y T R M P K R I  
1981 TACGCGAAGCTACTCGCTACTGCGGAGATGGAGATCAAATACAAACCGAAGGTTCTTGT  
661 Y A K L L A T A E M E I K Y K P K V L V  
2041 TCTCAAGTATGGAATGCCATCATCATTTCATGTACCGGAACATCTTTTATCTATCCAC  
681 S Q V W N A I I I S M Y R E H L L S I H  
2101 CATGTGCAACGTCTCCTATATCATCAAGTTGATGGACCAGACGGTCGCCGTGTCCTTCGA  
701 H V Q R L L Y H Q V D G P D G R R V L R  
2161 GCTCCTCCGTTCTTCACTCATAATAACGGCAACGAAAGTACTTCTTCCCTCCAGGCGGC  
721 A P P F F T H N N G N E S D F F P P G G  
2221 GAGGCTGAACGTCGTATCTCCTTCTTTGGCGTCATCCCTCACCACTGCGCTTCCCGATCCT

741 E A E R R I S F F A S S L T T A L P D P  
2281 CTTCCGGTTGATGCCATGCCGACGTTACGGTCTAGTACCCATTACTCCGAGAAGATC  
761 L P V D A M P T F T V L V P H Y S E K I  
2341 CTGCTGAGCTTGCCTGAGATTATCAGGGAGGAGGATCAGAATACTCGCGTTACCCTCCTC  
781 L L S L R E I I R E E D Q N T R V T L L  
2401 GAATATCTGAAGCAGCTACACCCTGTTGAATGGGACAATTTTCGTGAAAGATACCAAGATT  
801 E Y L K Q L H P V E W D N F V K D T K I  
2461 TTGGCGGAGGAGTCGGAGACGTCAACGTTTACGGCACTGGTACTACTAACGAGAAGTCA  
821 L A E E S E T S T F D G T G T T N E K S  
2521 AACAAACCGCACGGATGATCTGCCATTCTACTGCATTGGATTCAAGACTGCCGCACCCGAG  
841 N N R T D D L P F Y C I G F K T A A P E  
2581 TACACTCTTCGTACCCGCATCTGGGCTTCGCTCCGCGCGCAGACTCTACCGTACGGTG  
861 Y T L R T R I W A S L R A Q T L Y R T V  
2641 TCCGGGATGATGAACTATGCCAAGGCCATCAAGCTGTTGTATCGCGTCGAGAACCCGAG  
881 S G M M N Y A K A I K L L Y R V E N P Q  
2701 ATTGTGCAGCGGTTCCCGGGAACACGGACAGACTCGAGCGTGAGCTGGAGCGTATGTGC  
901 I V Q R F A G N T D R L E R E L E R M S  
2761 AGGCGGAAGTTCAAGTTCACTGTGTCCATGCAGCGGTATGCCAAGTTCAACAAGGAGGAG  
921 R R K F K F T V S M Q R Y A K F N K E E  
2821 CTTGAGAACCGGAGTTTCTCCTGCGTGCATACCCGGATCTGCAGATTGCATACCTCGAC  
941 L E N A E F L L R A Y P D L Q I A Y L D  
2881 GAAGAACCCGGTCCGAAGGTGGAGACCCGCGATTGTTTTCTGTACTCATTGATGGTCAT  
961 E E P G P K G G D P R L F S V L I D G H  
2941 TCAGAGGTGGACAGCAAGACTGGGAAGCGGATGCCCAAGTTCCGCATTGAGCTTCCCGGC  
981 S E V D S K T G K R M P K F R I E L P G  
3001 AATCCCATTCTCGGTGATGGCAAGTCCGACAACCAGAATCATGCGATCATCTTCTACCGT  
1001 N P I L G D G K S D N Q N H A I I F Y R  
3061 GGCGAATACCTGCAGCTCATCGATGCCAACCAGGATAACTACCTGGAGGAATGCATCAAG  
1021 G E Y L Q L I D A N Q D N Y L E E C I K  
3121 ATTCGGAGCATCCTTGGTGAGTTTGAGGAATACACTATCTCCAGTCAAAGCCCGTATGCA  
1041 I R S I L G E F E E Y T I S S Q S P Y A  
3181 CAATGGGGTCACAAGGAGTTCAAAAGATCCCCTGTGGCGATCGTGGTACTCGCGAGTAC  
1061 Q W G H K E F K R S P V A I V G T R E Y  
3241 ATCTTCTCAGAGAACATTGGTGTCTGGGTGACATTGCAGCAGGTAAGGAACAGACGTT  
1081 I F S E N I G V L G D I A A G K E Q T F  
3301 GGTACGATGACTCCGCGGTTTTGGCTTGGATCGGCGGCAAGCTGCACTACGGTCACCCC  
1101 G T M T P R V L A W I G G K L H Y G H P  
3361 GATTTCTGAACGCGGCATTTCATGGCCACGCGGGTGGTGTCTTAAGGCTCAGAAGGGT

1121 D F L N A A F M A T R G G V S K A Q K G  
3421 CTGCATCTTAACGAGGACATTTTCGCTGGTATGAACGCTATCGGCCGTGGTGGGCGCATC  
1141 L H L N E D I F A G M N A I G R G G R I  
3481 AAACACTCGGAGTACTACCAGTGCAGAAAGGGTCGTGACCTTGGCTTCGGCACCATCCTG  
1161 K H S E Y Y Q C G K G R D L G F G T I L  
3541 AACTTCCAGACGAAACTGGGGACTGGTATGGGTGAGCAAATGCTTAGCAGAGAGTACTAC  
1181 N F Q T K L G T G M G E Q M L S R E Y Y  
3601 TATCTGGGTACCCAGTTACCCTTGGACCGTTTCCTCACCTTCTATTATGGACATCCTGGA  
1201 Y L G T Q L P L D R F L T F Y Y G H P G  
3661 TTCCACATCAACAACATCTTGGTTATCTACTCCATCCAGATCTTCATGGTCACTCTCTTG  
1221 F H I N N I L V I Y S I Q I F M V T L L  
3721 TATATCGGCACATTGAATAAGGAACTCGCGGTTTGCATTATCAATTGCAAGGGGACGTT  
1241 Y I G T L N K E L A V C I I N S Q G D V  
3781 ATTGGTGGTCAGCCCGGTTGTTACAATTTAACCCCGTCTTCCAGTGGATTAAACGATGC  
1261 I G G Q P G C Y N L T P V F Q W I K R C  
3841 ATCATATCCATCTTTTTGGTCTTCTTCATCGCTTTCTTGCCACTATTCTTGCAAGAACTG  
1281 I I S I F L V F F I A F L P L F L Q E L  
3901 CTCGAACGAGGCACAGGAAAGGCATTGATTCGTCTTGAAAAACATTTCCCTATCCCTTTCT  
1301 L E R G T G K A L I R L G K H F L S L S  
3961 CCCATTTTCGAAGTCTTTTCCACCCAGATCTACTCGCAGTCCATCTTGAGCAATCTGACG  
1321 P I F E V F S T Q I Y S Q S I L S N L T  
4021 TTCGGCGGCGCGCGGTACATCGCCACGGGACGTGGATTTGCAACCACGCGGATATCCTTC  
1341 F G G A R Y I A T G R G F A T T R I S F  
4081 ACCATACTCTATTCCCGCTTCGCTGGTCCCTAGTATCTATATGGGCATGCGCAACGTTCTT  
1361 T I L Y S R F A G P S I Y M G M R N V L  
4141 CTACTCTTGATGCCACTATGGCCATCTGGACACCGTACCTGATCTACTTCTGGTTCTCG  
1381 L L L Y A T M A I W T P Y L I Y F W F S  
4201 GTCCTCTCATTGTGTATCGCGCCTTTCGTATTCAACCCGCATCAGTTCTCTTCCCGGAC  
1401 V L S L C I A P F V F N P H Q F S F P D  
4261 TTCATCATCGATTATCGGGAGTTCTTGCCTGGATGTCTCGCGGCAATTCTCGCACAAG  
1421 F I I D Y R E F L R W M S R G N S R T K  
4321 GCCAGCAGTTGGTACGGCTATTGTCGTCTCTCGGAACGATGATCACTGGTTACAAGAAG  
1441 A S S W Y G Y C R L S R T M I T G Y K K  
4381 AAGAACTCGGTCATCCTTCGGAGAAGTTATCTGGAGACGTCCCCGCGCAAGGTGGAAA  
1461 K K L G H P S E K L S G D V P R A R W K  
4441 GCCGTCATCTTCTCTGAGATCGTGTGGCCGATCTGTCAAGCTACGATATTTGTTGTCGCG  
1481 A V I F S E I V W P I C Q A T I F V V A  
4501 TATATGTTCTGAAATCGTTCCTCCGAATCACCTCGGGCAACAGAATCCCAGTCCATTCATC

1501 Y M F V K S F P N H L G Q Q N P S P F I  
4561 CGCATTGCCGTCATTGCTGTTGGGCCCGTCGTATGGAACGCGCGATCTTGTGGCTCTG  
1521 R I A V I A V G P V V W N A A I L L A L  
4621 TTCTTCATTTTCGTTGTTCC TAGGGCCGATGATGGAATCTTGGACGAGATTCGCTTCGGTA  
1541 F F I S L F L G P M M E S W T R F A S V  
4681 ATGGCCGCACTTGCTCATTTCTCGCCCTGTTCCGGTCTTATCGCATTTTTTCGAATTCTTC  
1561 M A A L A H F L A L F G L I A F F E F F  
4741 TGGTTCCTCGAGCTGTGGGATGCGTCACACGCCGTTCTTGGGGCGATCTCCATCATCGCT  
1581 W F L E L W D A S H A V L G A I S I I A  
4801 ATCCAGCGCCCATCCAGAAGATCCTGATAGCTGTCTTCTGTGCGGGAGTACAAGCAT  
1601 I Q R A I Q K I L I A V F L S R E Y K H  
4861 GACGAGACGAATCGTGCCTGGTGGTCAGGTAAATGGTATGGACGGGGACTAGGCAATTCT  
1621 D E T N R A W W S G K W Y G R G L G N S  
4921 GCTTTGTCGCAACCTGCGCGGAGTATGTGGTGAAGATAGTTGAGATGTCTTTGTGGAGC  
1641 A L S Q P A R E Y V V K I V E M S L W S  
4981 TCGGATTTCTTATTGGCACACATATTGTTGATTATCATGACGCCTCCTACCCTCATCCCC  
1661 S D F L L A H I L L I I M T P P T L I P  
5041 TTTGTGACAAGCTGCATTCCACGATGATGTTCTGGTTACGACCATCCAAGCAGATACGA  
1681 F V D K L H S T M M F W L R P S K Q I R  
5101 CCGCCACTTTTCTCAACGAAACAAAGACGGCAACGTCGTTGGATCGTGGTGAAATACACC  
1701 P P L F S T K Q R R Q R R W I V V K Y T  
5161 TTCGTTTACATTGTAGTAGTGGCATGCCTCGCTGCGCTGATCGTGCTCCCTGCCCTCTTC  
1721 F V Y I V V V A C L A A L I V L P A L F  
5221 CGAGATCGCATCACGTTTAACTGTACACTATGTCAGAATATCTAA  
1741 R D R I T F N C T L C Q N I \*

**Fig. S3: Biosynthetic gene clusters in the *S. crispa* genome.**

The genes with predicted functions are: core biosynthetic genes (■), additional biosynthetic genes (■), transport-related genes (■), regulatory genes (■) and other genes (■).

contig\_000000F - Gene Cluster 1. Type = other. Location: 298010 - 342192 nt.

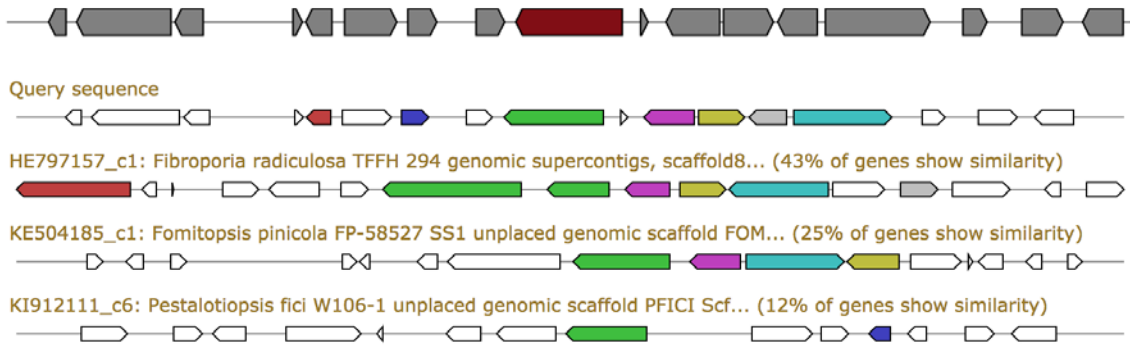

contig\_000000F - Gene Cluster 2. Type = other. Location: 2151671 - 2195752 nt.

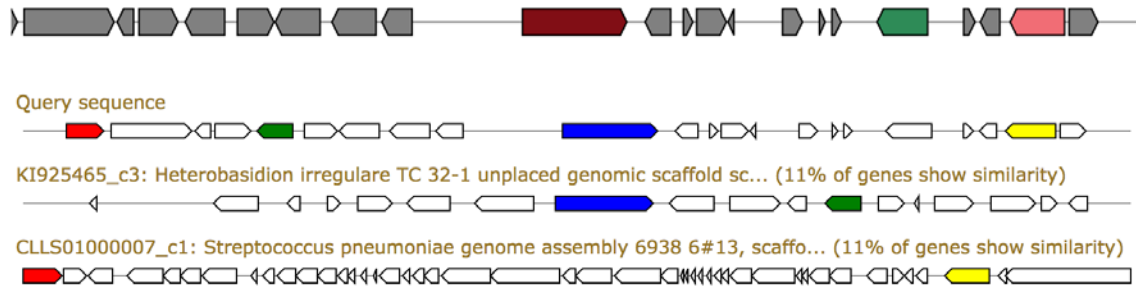

contig\_000001F - Gene Cluster 3. Type = terpene. Location: 577100 - 598315 nt.

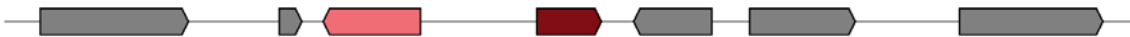

Query sequence

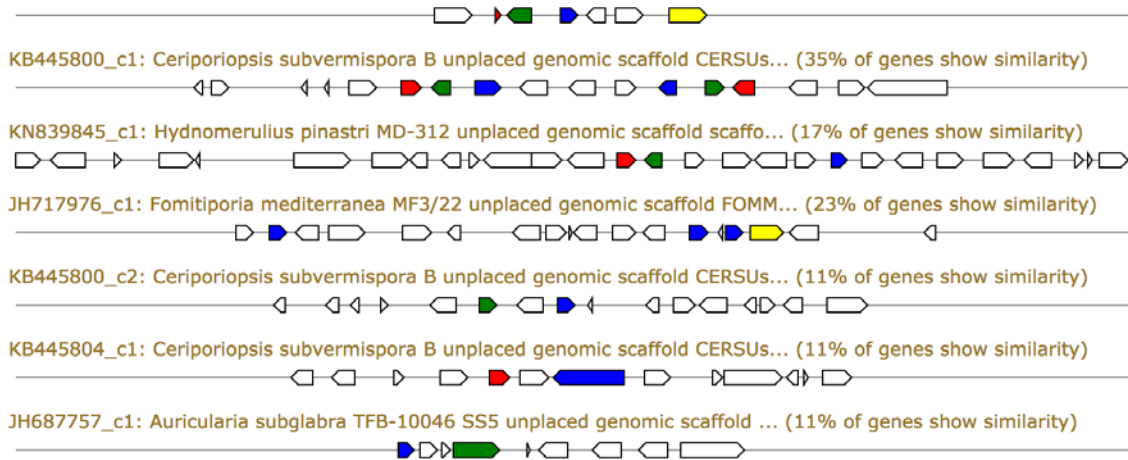

contig\_000001F - Gene Cluster 4. Type = other. Location: 1226000 - 1279843 nt.

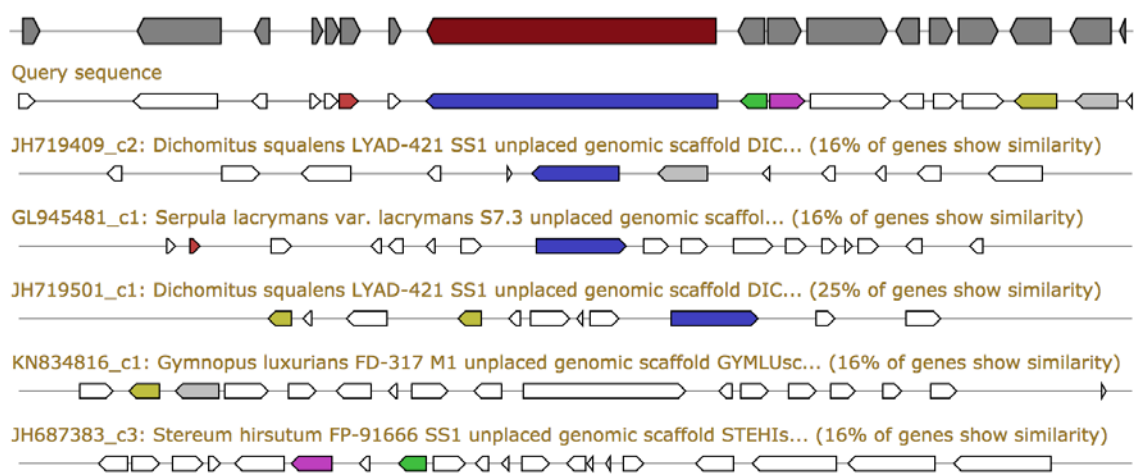

contig\_000002F - Gene Cluster 5. Type = terpene. Location: 1420916 - 1442540 nt.

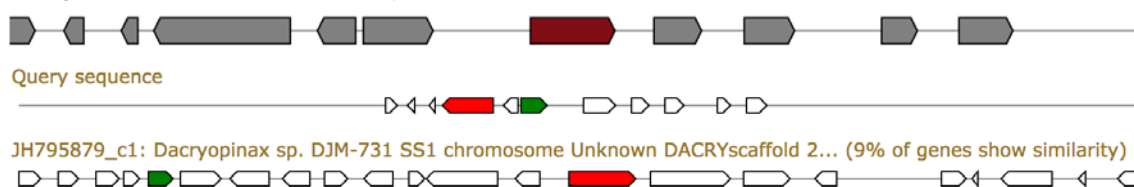

contig\_000002F - Gene Cluster 6. Type = t1pks. Location: 1903728 - 1956364 nt.

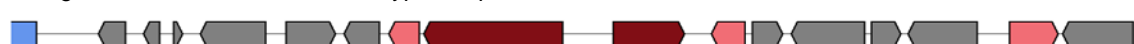

Query sequence

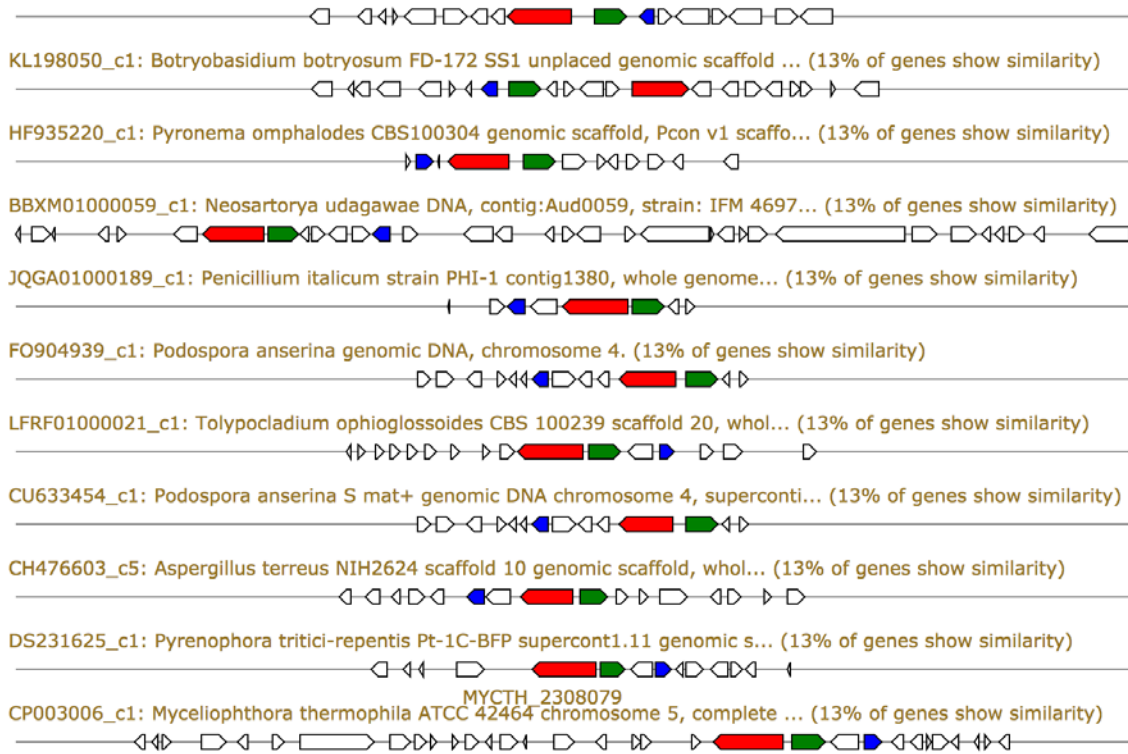

contig\_000002F - Gene Cluster 7. Type = terpene. Location: 2394718 - 2415961 nt.

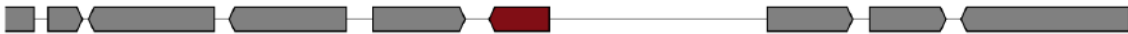

contig\_000003F - Gene Cluster 8. Type = terpene. Location: 780278 - 801362 nt.

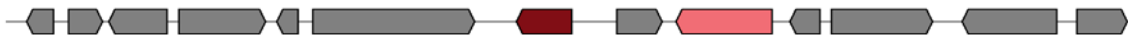

Query sequence

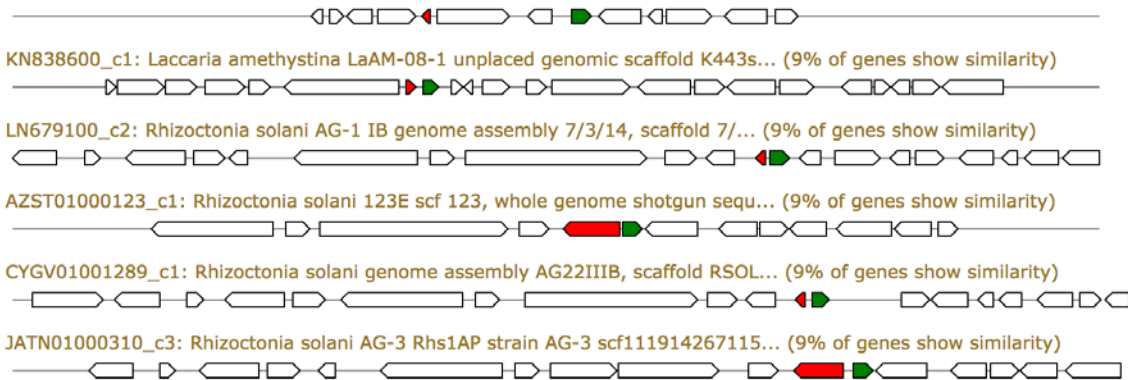



contig\_000003F - Gene Cluster 9. Type = terpene. Location: 1471027 - 1501332 nt.

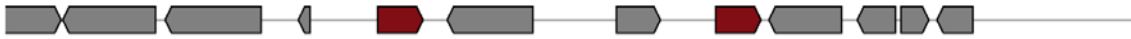

contig\_000003F - Gene Cluster 10. Type = terpene. Location: 1523295 - 1544372 nt.

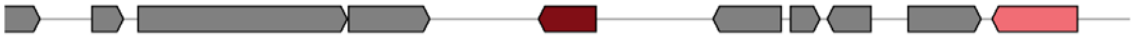

contig\_000004F - Gene Cluster 11. Type = other. Location: 2837290 - 2881205 nt.

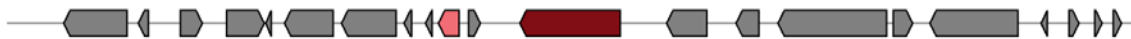

Query sequence

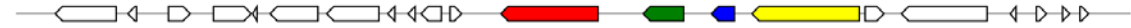

KE504137\_c1: *Fomitopsis pinicola* FP-58527 SS1 unplaced genomic scaffold FOM... (30% of genes show similarity)

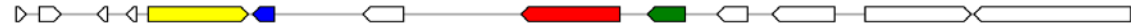

HE797066\_c1: *Fibroporia radiculosa* TFFH 294 genomic supercontigs, scaffold2... (30% of genes show similarity)

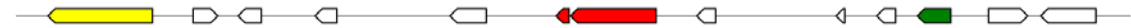

contig\_000005F - Gene Cluster 12. Type = indole. Location: 730480 - 752441 nt.

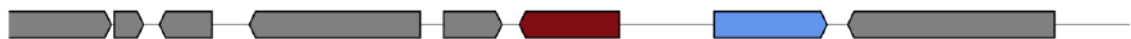

contig\_000005F - Gene Cluster 13. Type = terpene. Location: 1217614 - 1239213 nt.

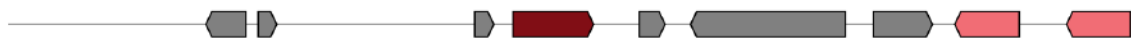

Query sequence

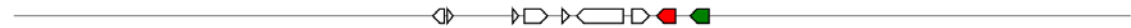

CP007014\_c5: *Pseudomonas syringae* CC1557, complete sequence. (4% of genes show similarity)

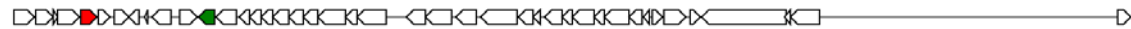

contig\_000005F - Gene Cluster 14. Type = other. Location: 1681418 - 1725375 nt.

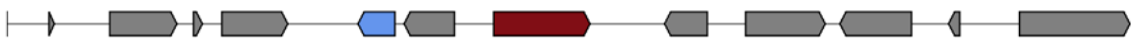

Query sequence

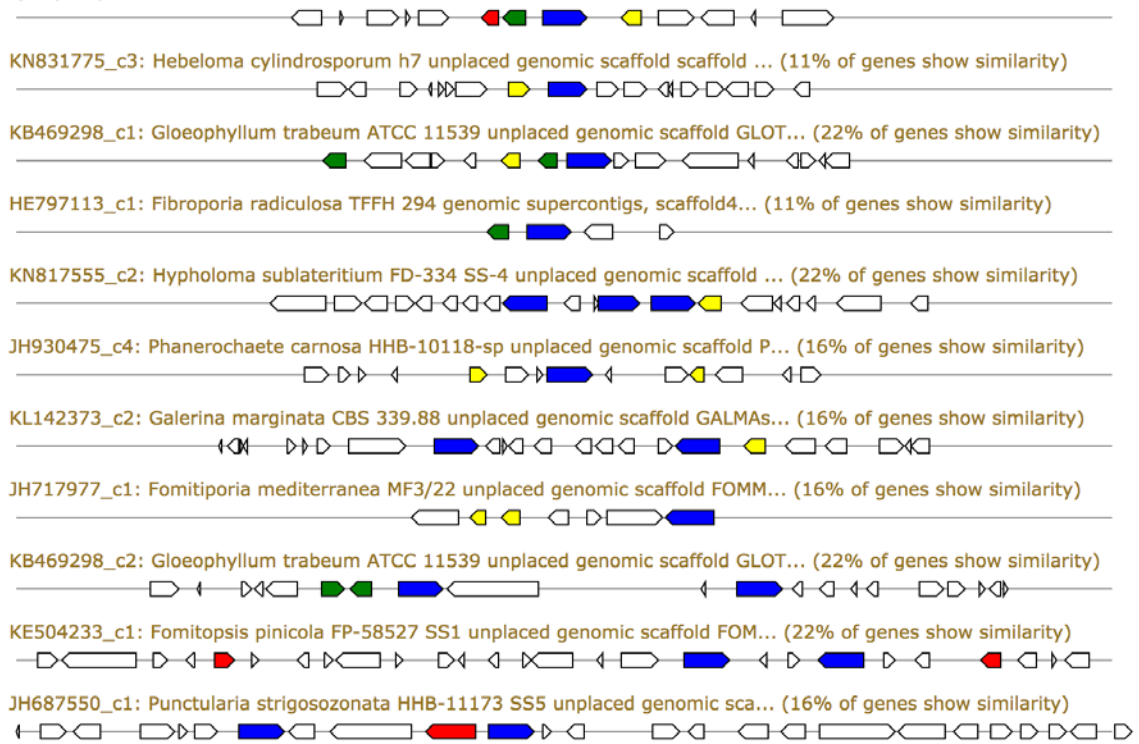

contig\_000006F - Gene Cluster 15. Type = terpene. Location: 344484 - 365726 nt.

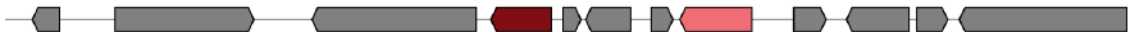

Query sequence

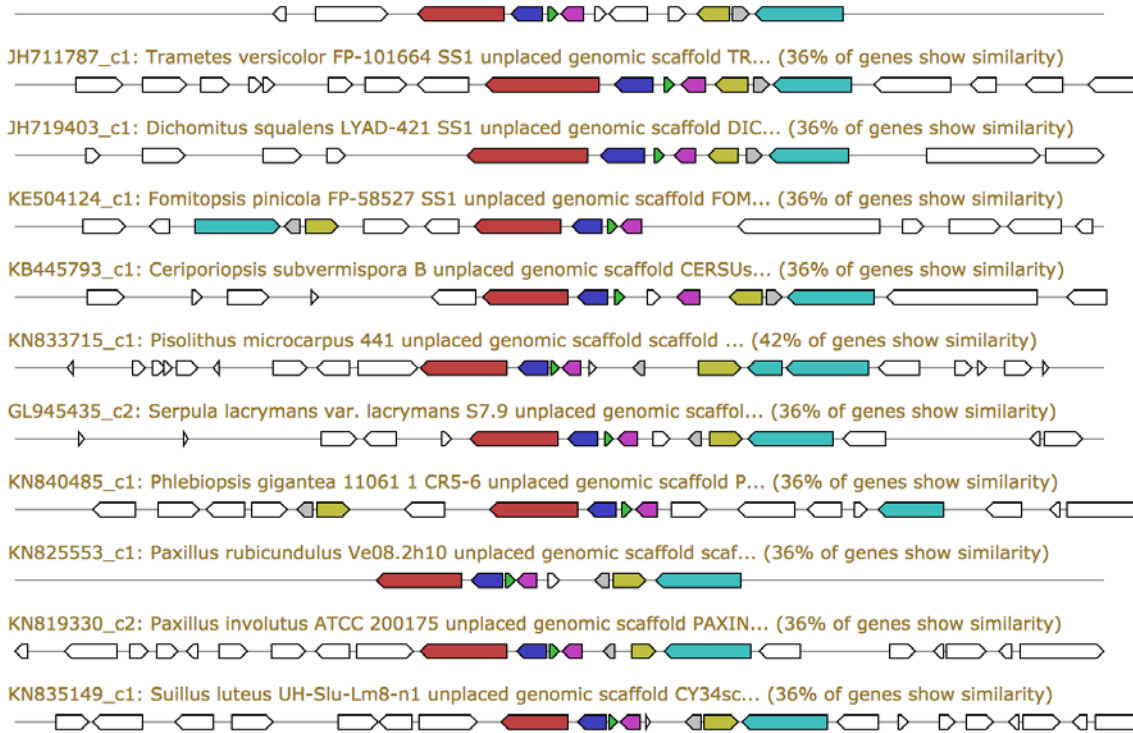

contig\_000007F - Gene Cluster 16. Type = terpene. Location: 1818743 - 1839963 nt.

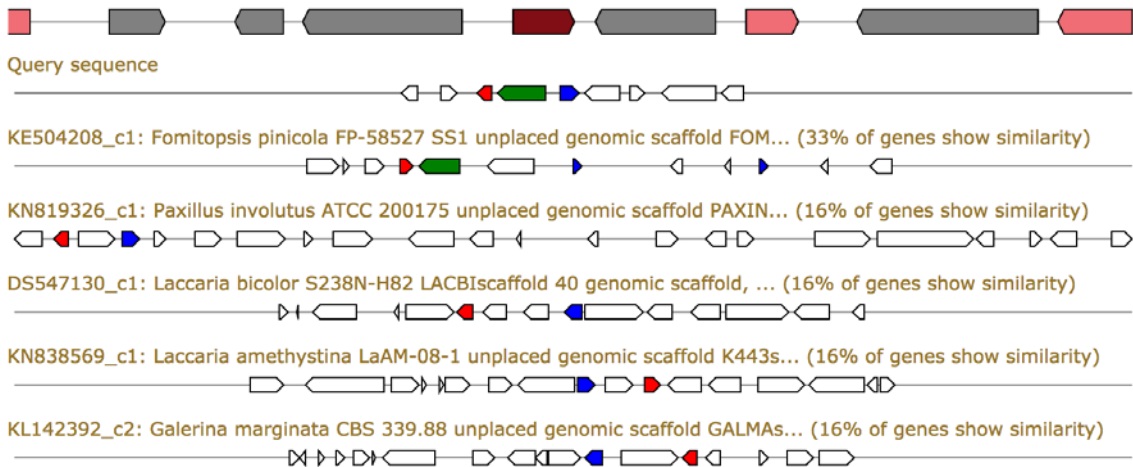

contig\_000008F - Gene Cluster 17. Type = terpene. Location: 106419 - 130408 nt.

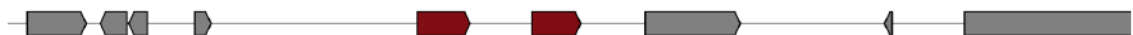

contig\_000008F - Gene Cluster 18. Type = other. Location: 882452 - 926420 nt.

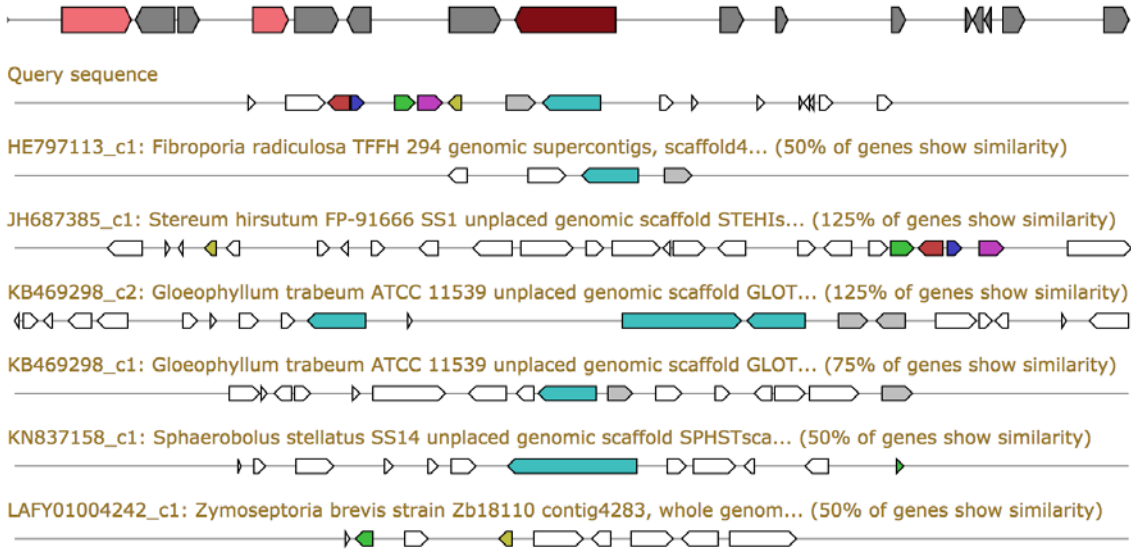

contig\_000008F - Gene Cluster 19. Type = terpene. Location: 1136595 - 1159210 nt.

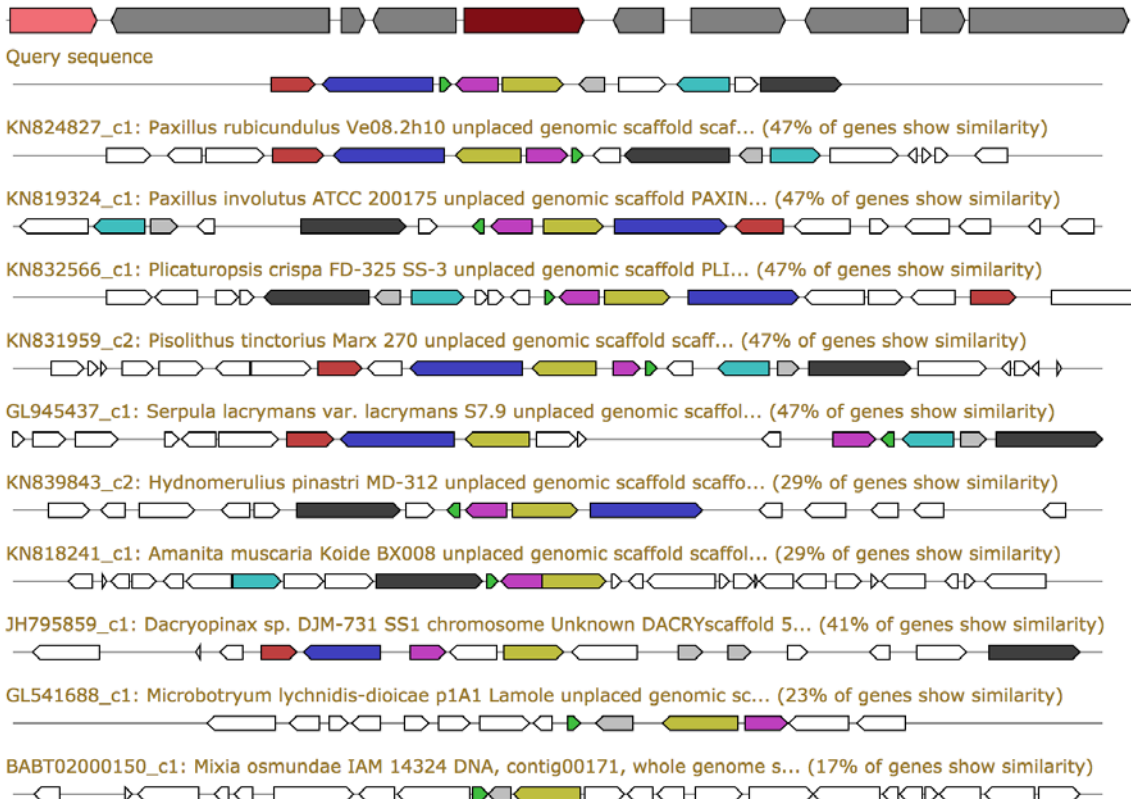

contig\_000008F - Gene Cluster 20. Type = terpene. Location: 1472478 - 1494300 nt.

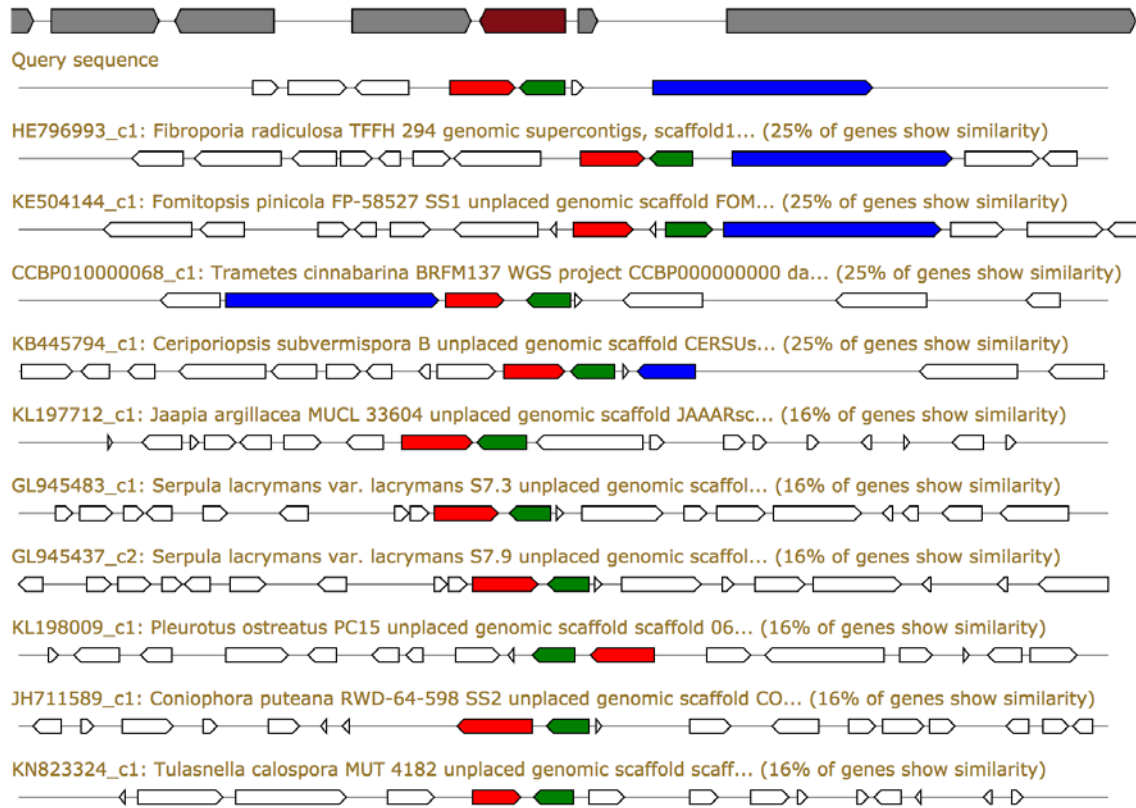

contig\_000011F - Gene Cluster 21. Type = other. Location: 351494 - 398797 nt.

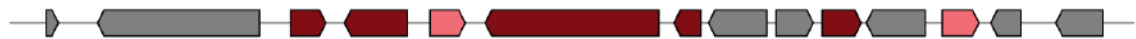

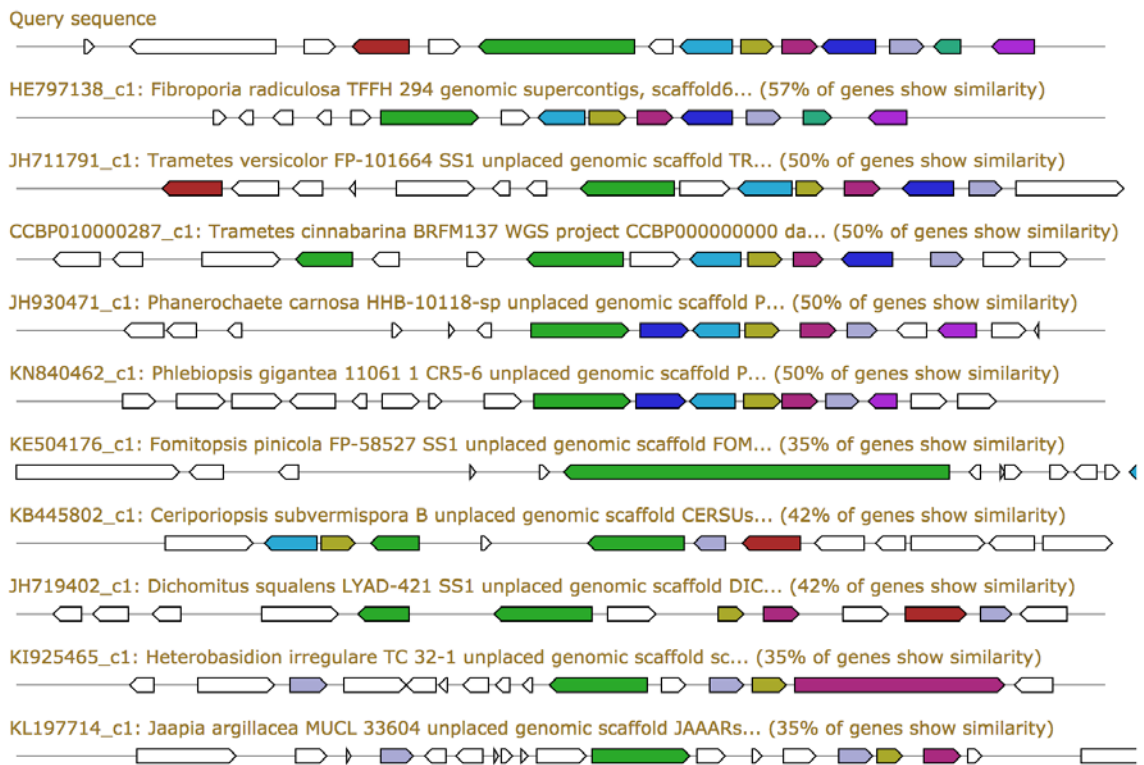

contig\_000010F - Gene Cluster 22. Type = t1pks. Location: 885689 - 934146 nt.

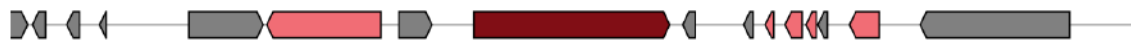

Query sequence

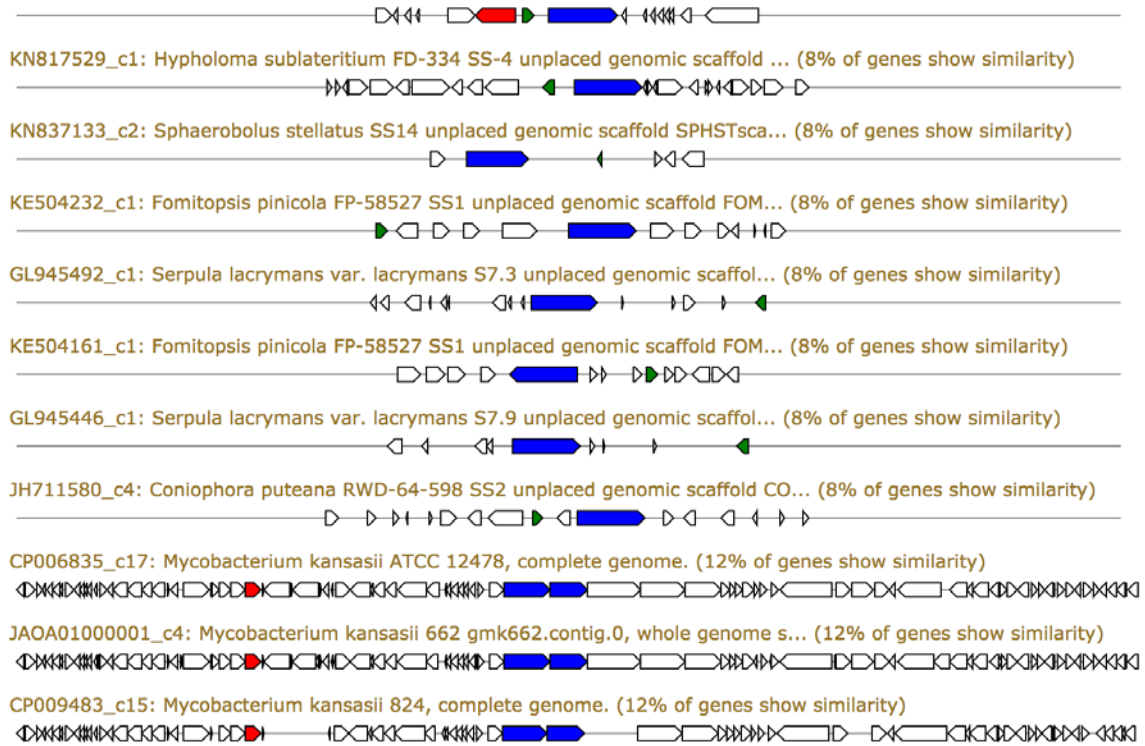

contig\_000010F - Gene Cluster 23. Type = indole-nrps. Location: 1041798 - 1097259 nt.

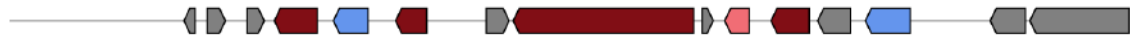



Query sequence

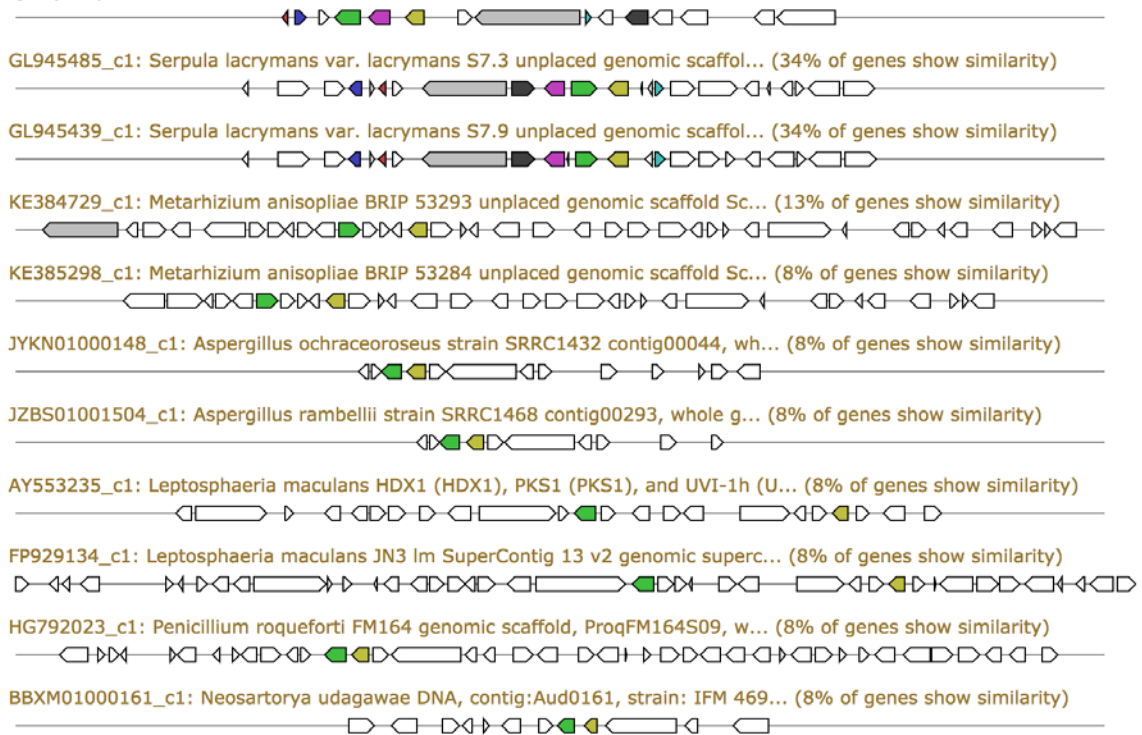

contig\_000012F - Gene Cluster 24. Type = terpene. Location: 174101 - 201152 nt.

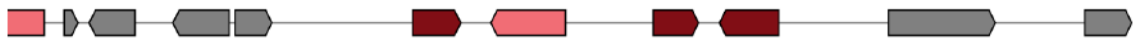



Query sequence

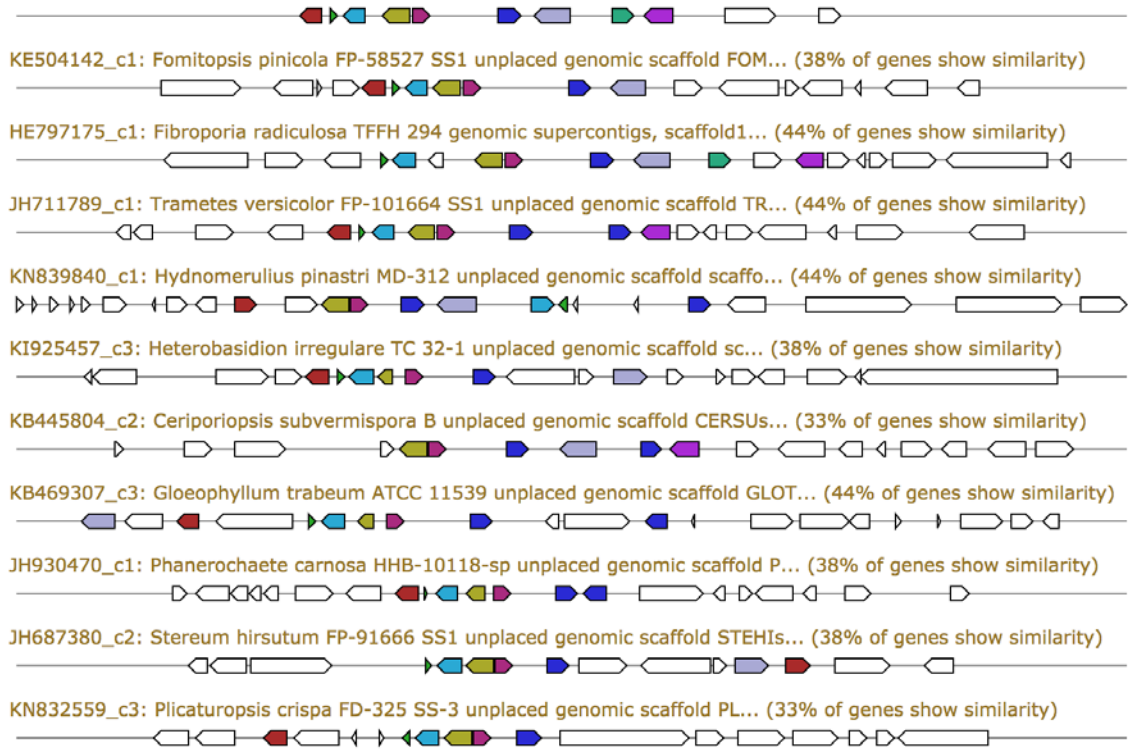

contig\_000013F - Gene Cluster 25. Type = terpene. Location: 466945 - 488536 nt.

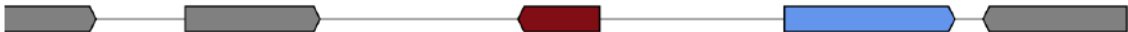

Query sequence

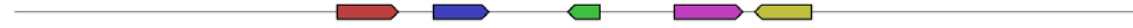

KN839859\_c1: *Hydnomerulius pinastri* MD-312 unplaced genomic scaffold scaffo... (33% of genes show similarity)

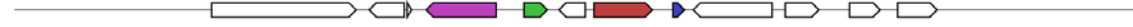

KN835223\_c1: *Suillus luteus* UH-Slu-Lm8-n1 unplaced genomic scaffold CY34sca... (33% of genes show similarity)

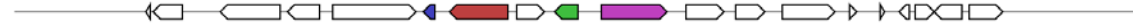

KN819335\_c1: *Paxillus involutus* ATCC 200175 unplaced genomic scaffold PAXIN... (33% of genes show similarity)

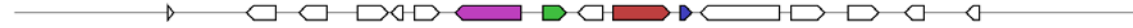

KN824867\_c1: *Paxillus rubicundulus* Ve08.2h10 unplaced genomic scaffold scaff... (41% of genes show similarity)

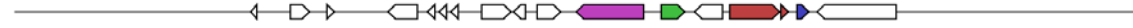

KL198005\_c1: *Pleurotus ostreatus* PC15 unplaced genomic scaffold scaffold 02... (33% of genes show similarity)

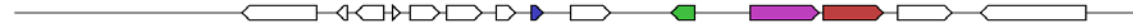

KN831945\_c1: *Pisolithus tinctorius* Marx 270 unplaced genomic scaffold scaff... (41% of genes show similarity)

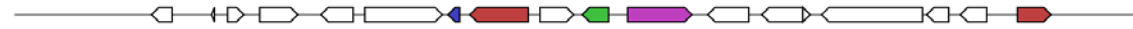

JH711792\_c1: *Trametes versicolor* FP-101664 SS1 unplaced genomic scaffold TR... (25% of genes show similarity)

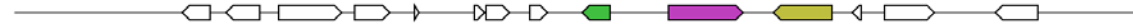

KN822004\_c1: *Scleroderma citrinum* Foug A unplaced genomic scaffold scaffold... (41% of genes show similarity)

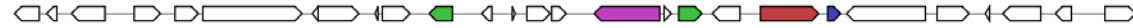

KB445800\_c4: *Ceriporiopsis subvermispora* B unplaced genomic scaffold CERSUs... (25% of genes show similarity)

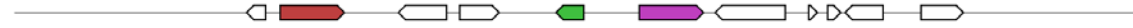

KN831770\_c1: *Hebeloma cylindrosporum* h7 unplaced genomic scaffold scaffold... (33% of genes show similarity)

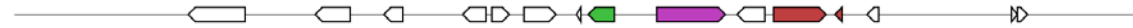

contig\_000014F - Gene Cluster 26. Type = terpene. Location: 887958 - 909591 nt.

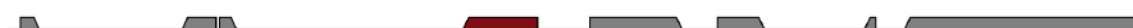

Query sequence

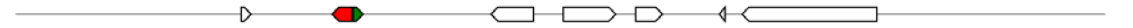

KQ085920\_c1: *Schizopora paradoxa* strain KUC8140 unplaced genomic scaffold S... (12% of genes show similarity)

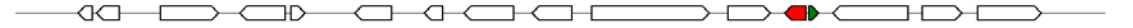

JH687764\_c1: *Auricularia subglabra* TFB-10046 SS5 unplaced genomic scaffold ... (12% of genes show similarity)

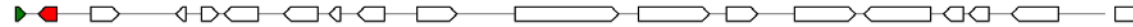

KL198004\_c1: *Pleurotus ostreatus* PC15 unplaced genomic scaffold scaffold 01... (12% of genes show similarity)

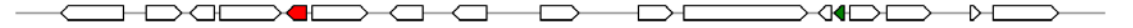

contig\_000015F - Gene Cluster 27. Type = t1pks. Location: 462780 - 507320 nt.

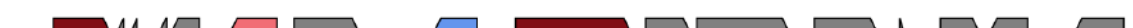

Query sequence

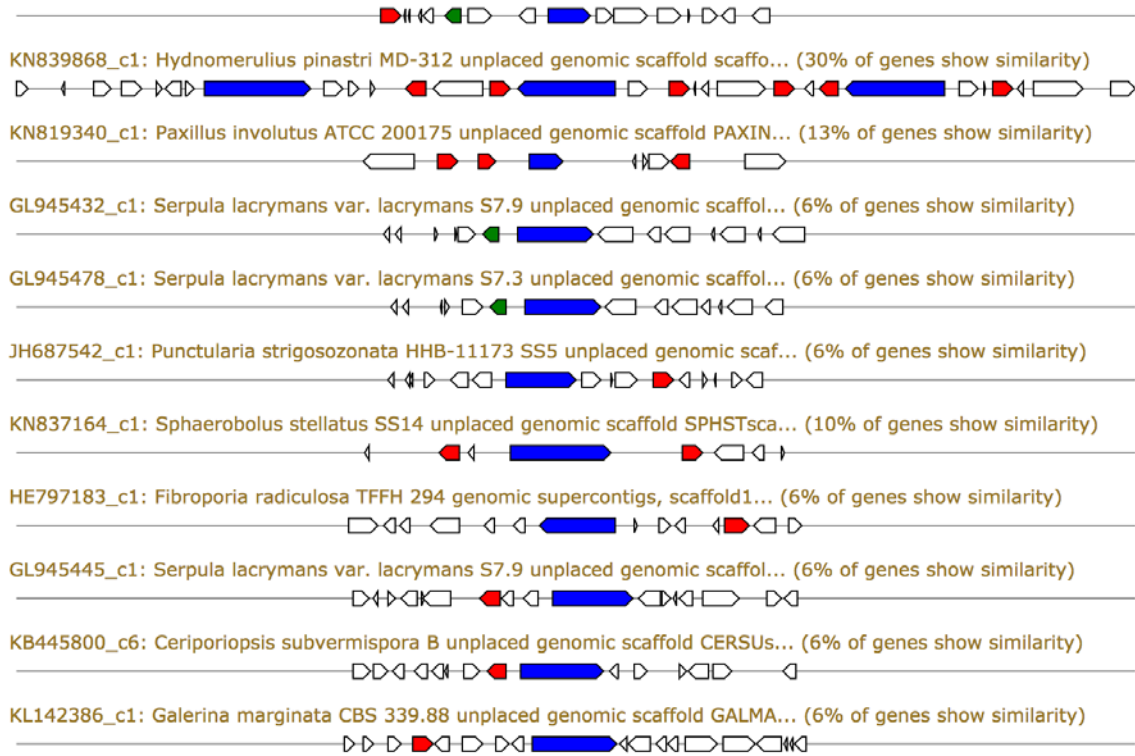

contig\_000016F - Gene Cluster 28. Type = other. Location: 119822 - 164105 nt.

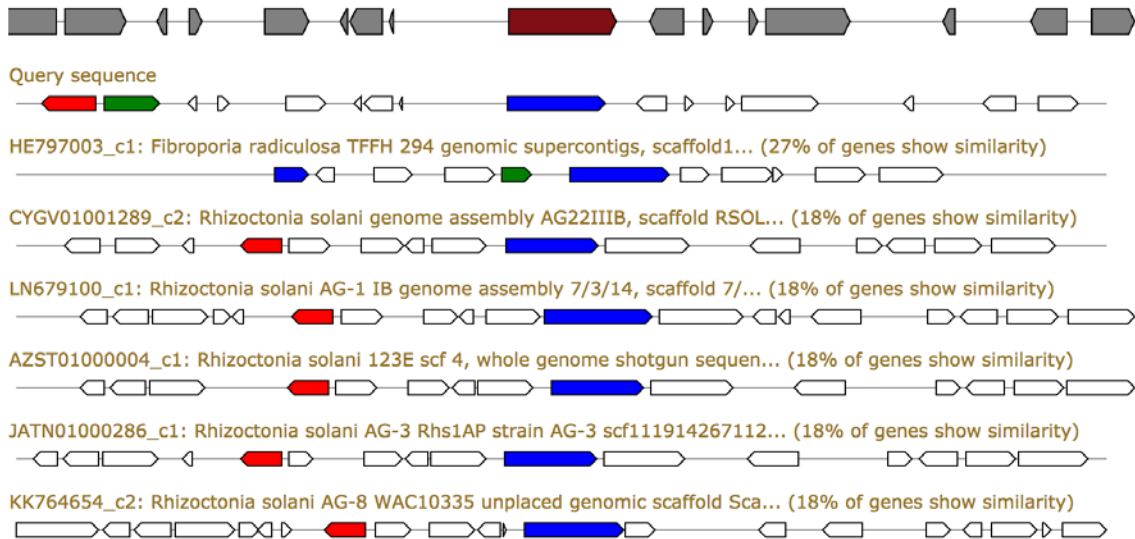

contig\_000016F - Gene Cluster 29. Type = t1pks. Location: 567660 - 616617 nt.

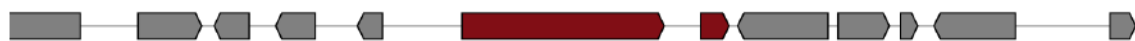

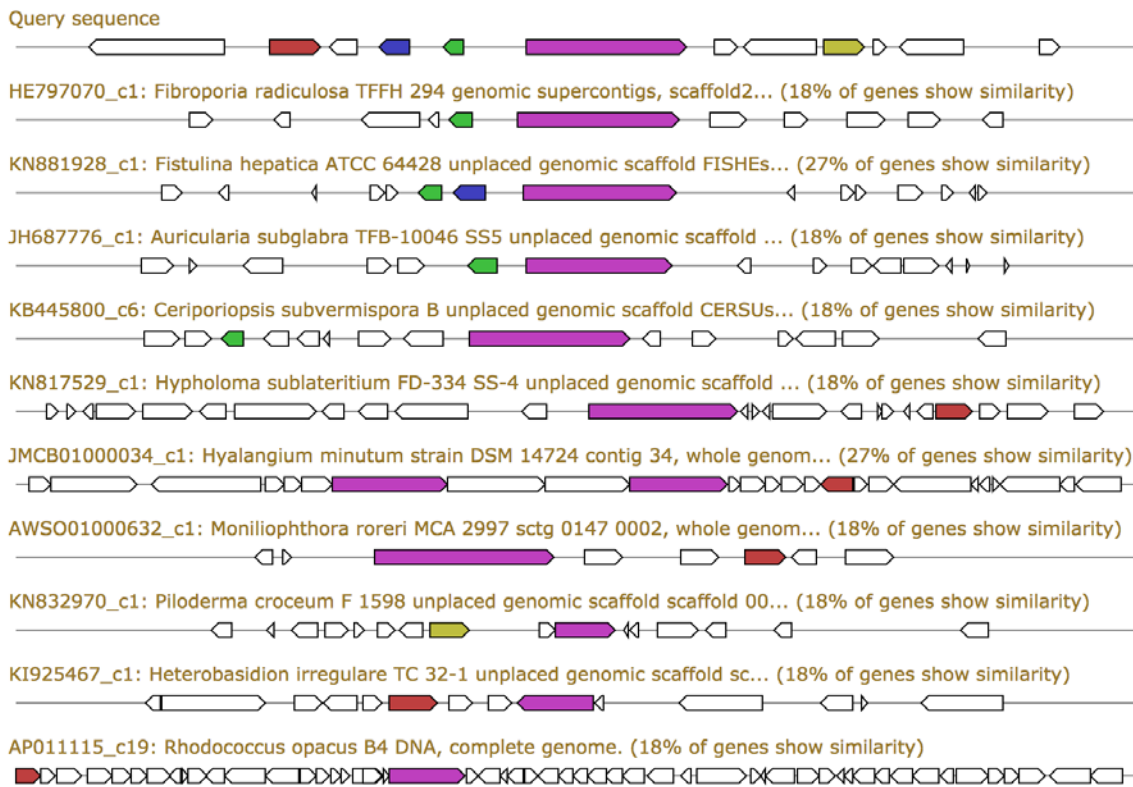

contig\_000016F - Gene Cluster 30. Type = t1pks. Location: 678964 - 727930 nt.

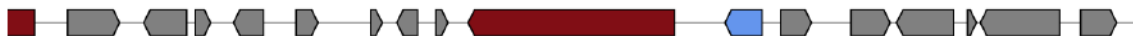

Query sequence

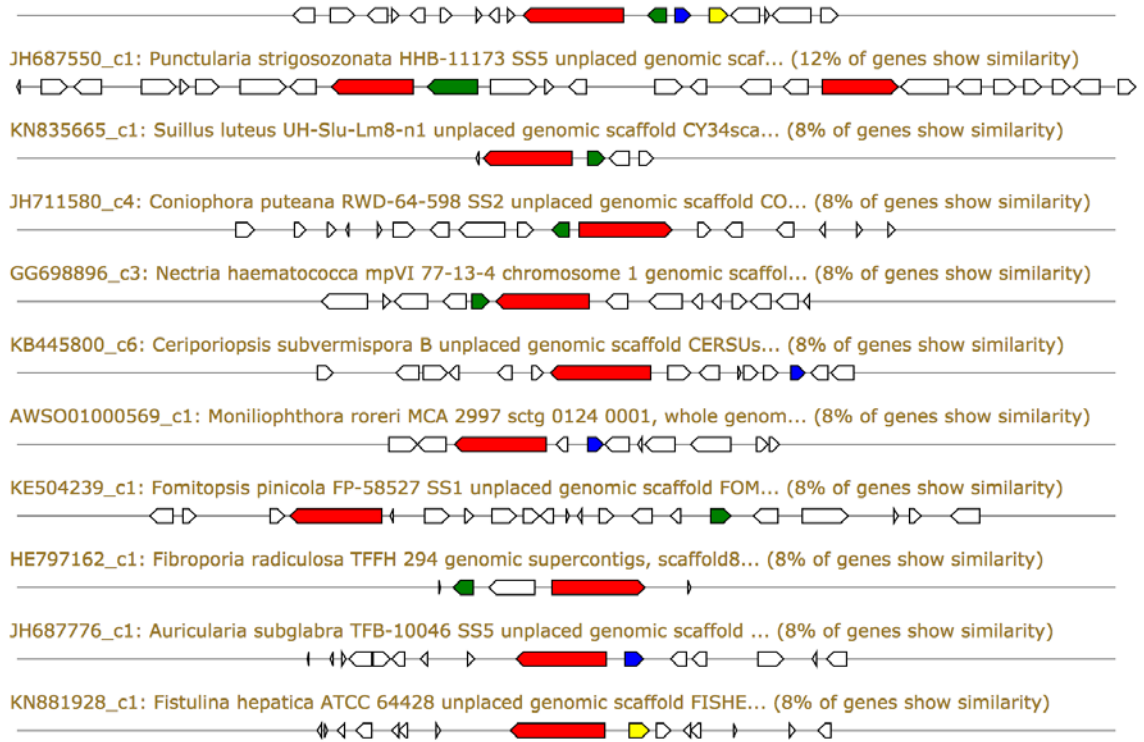

Supplementary Fig. S4

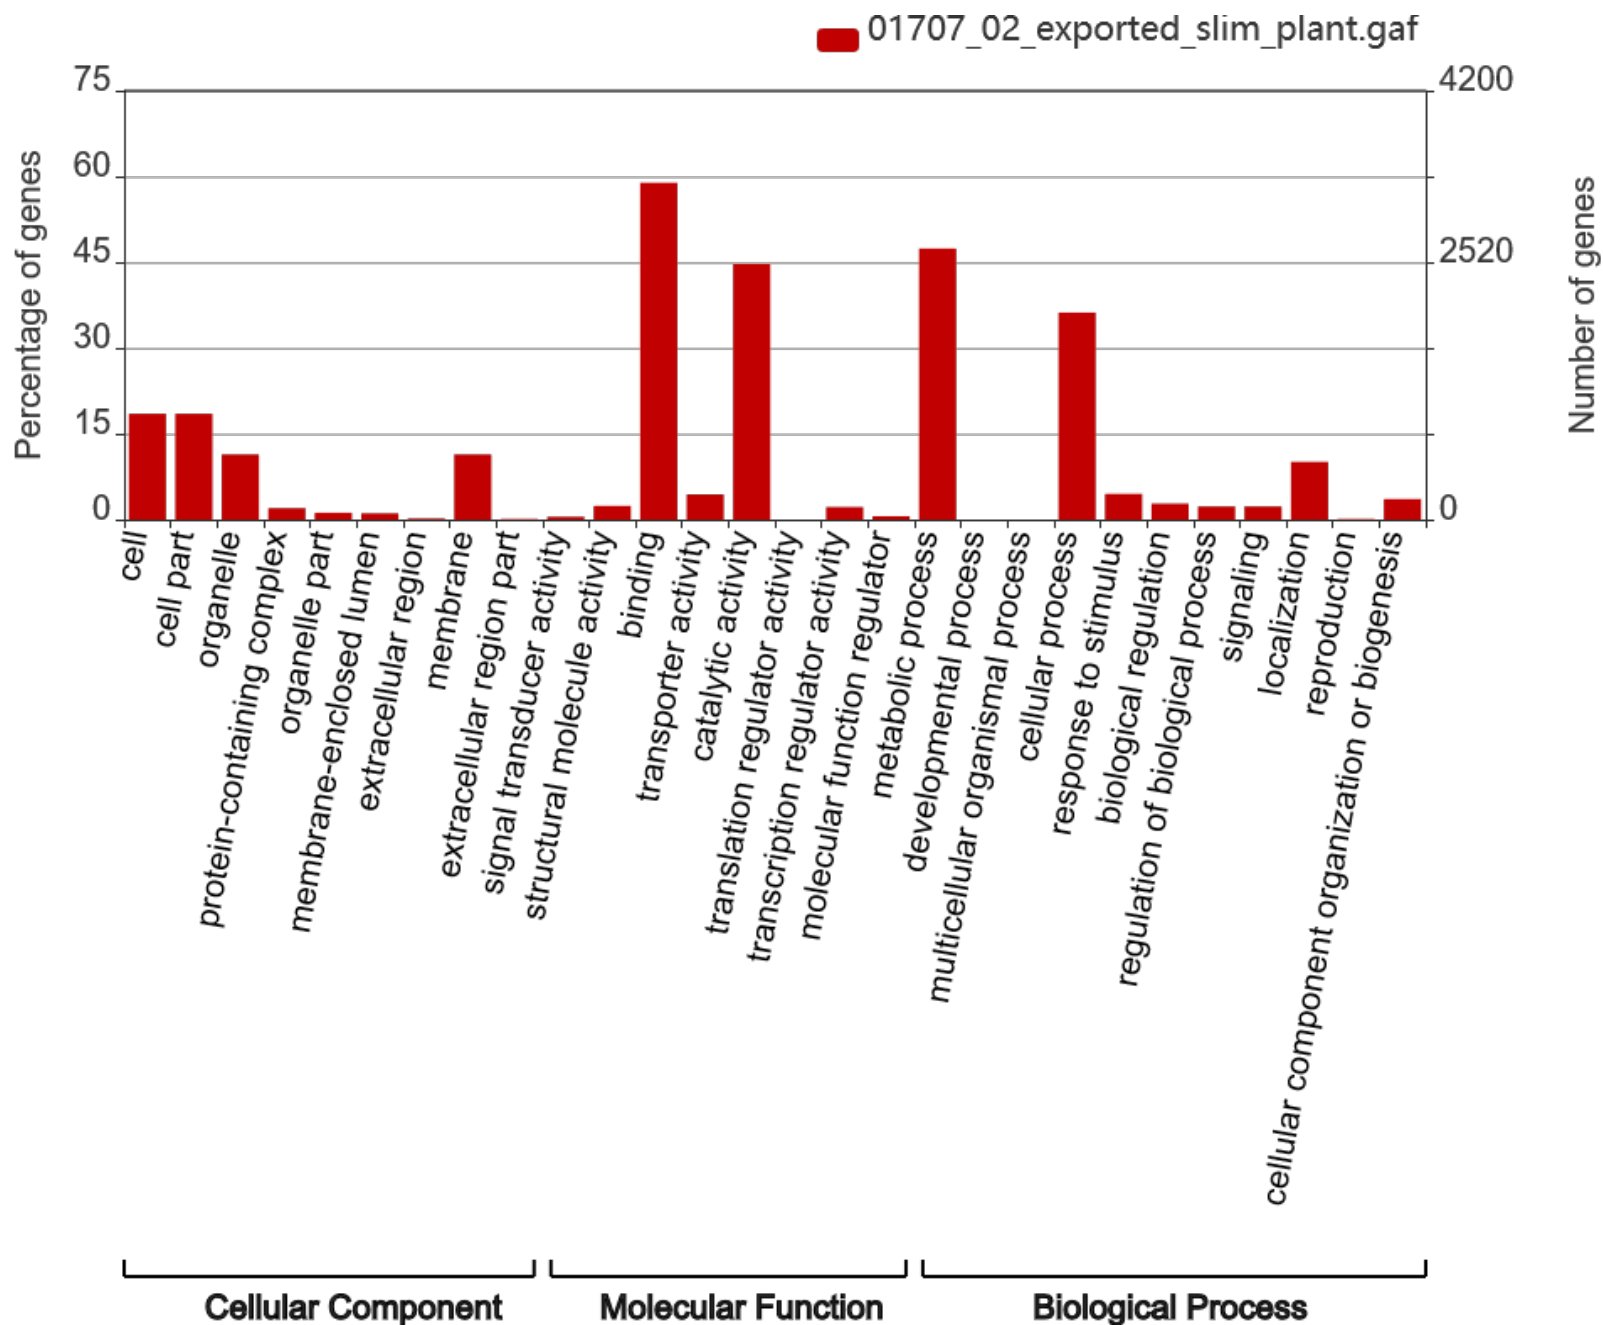

## Supplementary Fig. S5

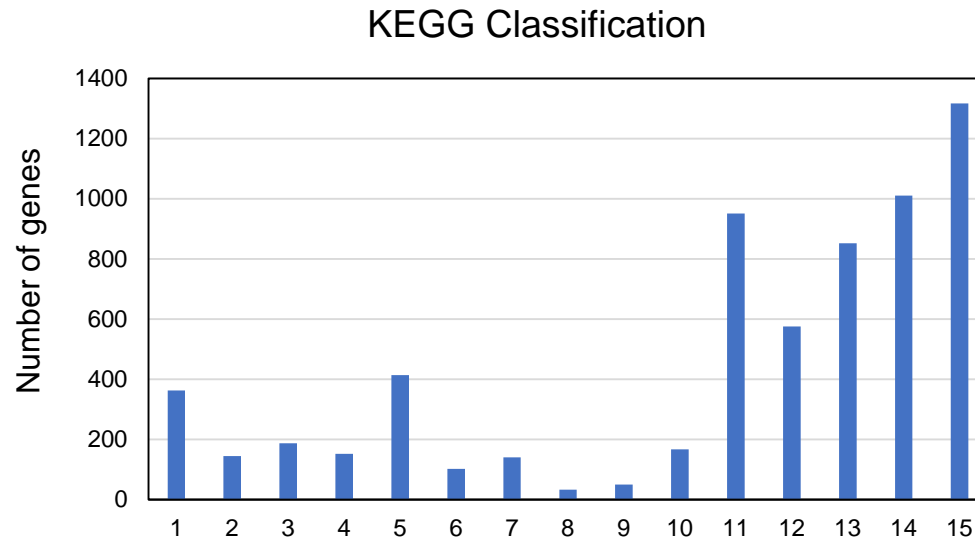

1. Carbohydrate metabolism (Metabolism)
2. Energy metabolism (Metabolism)
3. Lipid metabolism (Metabolism)
4. Nucleotide metabolism (Metabolism)
5. Amino acid metabolism (Metabolism)
6. Glycan biosynthesis/metabolism (Metabolism)
7. Metabolism of cofactors/vitamins (Metabolism)
8. Metabolism of terpenoids/polyketides (Metabolism)
9. Biosynthesis of other secondary metabolites (Metabolism)
10. Xenobiotics biodegradation/metabolism (Metabolism)
11. Genetic Information Processing
12. Environmental Information Processing
13. Cellular Processes
14. Organismal Systems
15. Diseases

**Table S1. Assembly statistics.**

---

|                            |            |
|----------------------------|------------|
| Contig total number        | 32         |
| Contig size (bp)           | 39,020,349 |
| Contig mean length (bp)    | 1,219,386  |
| Contig maximum length (bp) | 4,666,114  |
| Contig minimum length (bp) | 23,725     |
| Contig L50                 | 5          |
| Contig N50 (bp)            | 3,179,637  |
| Contig L90                 | 15         |
| Contig N90 (bp)            | 1,017,009  |

---



Table S2. Gene model statistics.

---

|                                 |            |
|---------------------------------|------------|
| Genes Total                     | 13,157     |
| Average Gene length (bp)        | 1,669.3    |
| Gene Size (bp)                  | 17,446,980 |
| Transcripts Total               | 13,157     |
| Average Transcripts length (bp) | 1,326.1    |
| Exons per genes                 | 5.7        |
| Protein Total                   | 13,157     |
| Average Protein length (bp)     | 441.0      |

---

**Table S4. Resources of the other 25 fungi for OrthoMCL analysis**

| Abbreviation | Species                            | Downloading website                                                                                                                                                                                   |
|--------------|------------------------------------|-------------------------------------------------------------------------------------------------------------------------------------------------------------------------------------------------------|
| abis         | <i>Agaricus bisporus</i>           | <a href="http://genome.jgi.doe.gov/Agabi_varbisH97_2/Agabi_varbisH97_2.home.html">http://genome.jgi.doe.gov/Agabi_varbisH97_2/Agabi_varbisH97_2.home.html</a>                                         |
| anig         | <i>Aspergillus niger</i>           | <a href="http://genome.jgi.doe.gov/Aspni_DSM_1/Aspni_DSM_1.home.html">http://genome.jgi.doe.gov/Aspni_DSM_1/Aspni_DSM_1.home.html</a>                                                                 |
| ccin         | <i>Coprinopsis cinerea</i>         | <a href="http://www.broadinstitute.org/annotation/genome/coprinus_cinereus/MultiHome.html">http://www.broadinstitute.org/annotation/genome/coprinus_cinereus/MultiHome.html</a>                       |
| cneg         | <i>Cryptococcus neoformans</i>     | <a href="http://www.broadinstitute.org/annotation/genome/cryptococcus_neoformans/MultiDownloads.html">http://www.broadinstitute.org/annotation/genome/cryptococcus_neoformans/MultiDownloads.html</a> |
| cpar         | <i>Cryphonectria parasitica</i>    | <a href="http://genomeportal.jgi-psf.org/Crypa2/Crypa2.home.html">http://genomeportal.jgi-psf.org/Crypa2/Crypa2.home.html</a>                                                                         |
| cput         | <i>Coniophora puteana</i>          | <a href="http://genome.jgi.doe.gov/Conpu1/Conpu1.home.html">http://genome.jgi.doe.gov/Conpu1/Conpu1.home.html</a>                                                                                     |
| dsqu         | <i>Dichomitus squalens</i>         | <a href="http://genome.jgi.doe.gov/Dicsq1/Dicsq1.home.html">http://genome.jgi.doe.gov/Dicsq1/Dicsq1.home.html</a>                                                                                     |
| glux         | <i>Gymnopus luxurians</i>          | <a href="http://genome.jgi.doe.gov/Gymlu1/Gymlu1.home.html">http://genome.jgi.doe.gov/Gymlu1/Gymlu1.home.html</a>                                                                                     |
| gtra         | <i>Gloeophyllum trabeum</i>        | <a href="http://genome.jgi.doe.gov/Glotr1_1/Glotr1_1.home.html">http://genome.jgi.doe.gov/Glotr1_1/Glotr1_1.home.html</a>                                                                             |
| lbic         | <i>Laccaria bicolor</i>            | <a href="http://genome.jgi-psf.org/Lacbi2/Lacbi2.home.html">http://genome.jgi-psf.org/Lacbi2/Lacbi2.home.html</a>                                                                                     |
| ledo         | <i>Lentinula edodes</i>            | <a href="http://legdb.chenlianfu.com/">http://legdb.chenlianfu.com/</a>                                                                                                                               |
| mrer         | <i>Moniliophthora roreri</i>       | <a href="http://www.ncbi.nlm.nih.gov/Traces/wgs/?val=AWSO01">http://www.ncbi.nlm.nih.gov/Traces/wgs/?val=AWSO01</a>                                                                                   |
| ncra         | <i>Neurospora crassa</i>           | <a href="http://www.broadinstitute.org/annotation/genome/neurospora/MultiDownloads.html">http://www.broadinstitute.org/annotation/genome/neurospora/MultiDownloads.html</a>                           |
| pchr         | <i>Phanerochaete chrysosporium</i> | <a href="http://genome.jgi.doe.gov/Phchr2/Phchr2.home.html">http://genome.jgi.doe.gov/Phchr2/Phchr2.home.html</a>                                                                                     |
| post         | <i>Pleurotus ostreatus</i>         | <a href="http://genome.jgi-psf.org/PleosPC15_2/PleosPC15_2.home.html">http://genome.jgi-psf.org/PleosPC15_2/PleosPC15_2.home.html</a>                                                                 |
| ppla         | <i>Postia placenta</i>             | <a href="https://genome.jgi.doe.gov/PosplRSB12_1/PosplRSB12_1.home.html">https://genome.jgi.doe.gov/PosplRSB12_1/PosplRSB12_1.home.html</a>                                                           |
| psti         | <i>Pichia stipitis</i>             | <a href="http://genome.jgi-psf.org/Picst3/Picst3.home.html">http://genome.jgi-psf.org/Picst3/Picst3.home.html</a>                                                                                     |
| scer         | <i>Saccharomyces cerevisiae</i>    | <a href="http://downloads.yeastgenome.org/sequence/S288C_reference/orf_protein/">http://downloads.yeastgenome.org/sequence/S288C_reference/orf_protein/</a>                                           |
| scom         | <i>Schizophyllum commune</i>       | <a href="http://genome.jgi-psf.org/Schco3/Schco3.home.html">http://genome.jgi-psf.org/Schco3/Schco3.home.html</a>                                                                                     |
| slac         | <i>Serpula lacrymans</i>           | <a href="http://genome.jgi.doe.gov/SerlaS7_9_2/SerlaS7_9_2.home.html">http://genome.jgi.doe.gov/SerlaS7_9_2/SerlaS7_9_2.home.html</a>                                                                 |
| snod         | <i>Stagonospora nodorum</i>        | <a href="http://genome.jgi.doe.gov/Stano2/Stano2.home.html">http://genome.jgi.doe.gov/Stano2/Stano2.home.html</a>                                                                                     |
| tree         | <i>Trichoderma reesei</i>          | <a href="http://genome.jgi-psf.org/Trire2/Trire2.home.html">http://genome.jgi-psf.org/Trire2/Trire2.home.html</a>                                                                                     |
| tver         | <i>Trametes versicolor</i>         | <a href="http://genome.jgi.doe.gov/Trave1/Trave1.home.html">http://genome.jgi.doe.gov/Trave1/Trave1.home.html</a>                                                                                     |

|      |                             |                                                                                                                                                                   |
|------|-----------------------------|-------------------------------------------------------------------------------------------------------------------------------------------------------------------|
| umay | <i>Ustilago maydis</i>      | <a href="http://www.broadinstitute.org/annotation/genome/ustilago_maydis/Home.html">http://www.broadinstitute.org/annotation/genome/ustilago_maydis/Home.html</a> |
| vvol | <i>Volvariella volvacea</i> | <a href="http://genome.jgi.doe.gov/Volvo1/Volvo1.home.html">http://genome.jgi.doe.gov/Volvo1/Volvo1.home.html</a>                                                 |

**Table S5. The loci of matA and matB genes.**

| Gene               | ID                      | Scaffold      | Strand | Start   | End     | Protein length (aa) |
|--------------------|-------------------------|---------------|--------|---------|---------|---------------------|
| matA-related genes |                         |               |        |         |         |                     |
| HD1                | evm_000000F arrow.597.2 | 000000F arrow | -      | 1768661 | 1770872 | 665                 |
| HD2                | evm_000000F arrow.598   | 000000F arrow | +      | 1771134 | 1773073 | 595                 |
| mip                | evm_000000F arrow.599   | 000000F arrow | -      | 1773895 | 1776400 | 776                 |
| matB genes         |                         |               |        |         |         |                     |
| sc_pr1             | evm_000009F arrow.285   | 000009F arrow | +      | 807358  | 808999  | 456                 |
| sc_pr2             | evm_000009F arrow.286   | 000009F arrow | -      | 809633  | 811247  | 467                 |
| sc_pp1             | pp1                     | 000009F arrow | -      | 812739  | 812882  | 48                  |
| sc_pr3             | evm_000009F arrow.287   | 000009F arrow | -      | 813657  | 815134  | 405                 |
| sc_pr4             | evm_000009F arrow.288   | 000009F arrow | +      | 815483  | 816973  | 412                 |
| sc_pr5             | evm_000009F arrow.289   | 000009F arrow | -      | 817406  | 818732  | 334                 |
| sc_pp2             | pp2                     | 000009F arrow | +      | 819334  | 819462  | 43                  |
| sc_pp3             | evm_000009F arrow.290   | 000009F arrow | +      | 821494  | 821676  | 61                  |
| sc_pr6             | evm_000009F arrow.293   | 000009F arrow | +      | 828813  | 830599  | 557                 |
| sc_pr7             | evm_000009F arrow.298   | 000009F arrow | +      | 844144  | 845807  | 466                 |

**Table S7. Identification of type I and type II  $\beta$ -glucan synthase genes in *S. crispa*.**

| <i>S. crispa</i> gene    | Gene ID      | Identity (matched nucleotide/all) |
|--------------------------|--------------|-----------------------------------|
| <i>ScrFKS1</i> (Type I)  |              |                                   |
|                          | EKM78523     | 79%(1415/1795)                    |
|                          | XP_001878782 | 82%(1470/1794)                    |
|                          | XP_001837755 | 79%(1417/1793)                    |
|                          | XP_003031402 | 84%(1357/1623)                    |
|                          | ADX07311     | 80%(1372/1709)                    |
|                          | EGO01123     | 82%(1466/1778)                    |
|                          | EIW79670     | 80%(1430/1783)                    |
|                          | EIM87404     | 81%(1444/1789)                    |
|                          | EIN14554     | 81%(1457/1788)                    |
|                          | EKM57278     | 87%(1553/1788)                    |
|                          | EMD36733     | 88%(1563/1785)                    |
|                          | CCM04495     | 90%(1598/1784)                    |
|                          | EIW53177     | 86%(1543/1789)                    |
|                          | EJF59836     | 87%(1552/1787)                    |
|                          | EJD01928     | 80%(1352/1700)                    |
|                          | EJU00969     | 77%(1387/1802)                    |
| <i>ScrFKS2</i> (Type II) |              |                                   |
|                          | EJD05928     | 80%(1368/1702)                    |
|                          | KJ187309     | 92%(1536/1666)                    |
|                          | EMD38542     | 90%(1486/1644)                    |
|                          | CCL99114     | 85%(1501/1759)                    |
|                          | EKM55441     | 84%(1483/1760)                    |
|                          | EIW60373     | 89%(1470/1643)                    |
|                          | EJF65840     | 88%(1450/1643)                    |
|                          | EIN07381     | 83%(1370/1646)                    |
|                          | EIW85198     | 81%(1430/1769)                    |
|                          | EIM90013     | 82%(1437/1763)                    |
|                          | XP_003035758 | 79%(1402/1767)                    |
|                          | XP_001833273 | 79%(1403/1766)                    |
|                          | XP_001875386 | 77%(1271/1648)                    |
|                          | EKM82691     | 85%(1394/1644)                    |

**Table S8. List of biosynthetic gene clusters in the *S. crispa* genome.**

|                                                                                   | Gene ID     | Gene start | Gene end | Strand | Gene description                                                | EC number   |
|-----------------------------------------------------------------------------------|-------------|------------|----------|--------|-----------------------------------------------------------------|-------------|
| contig_000000F - Gene Cluster 1. Type = other. Location: 298010 - 342192 nt.      | SCP_0101000 | 318009     | 322192   | -      | SMCOG1002:AMP-dependent_synthetase_and_ligase                   |             |
| contig_000000F - Gene Cluster 2. Type = other. Location: 2151671 - 2195752 nt.    | SCP_0107660 | 2171670    | 2175752  | +      | SMCOG1002:AMP-dependent_synthetase_and_ligase                   |             |
| contig_000001F - Gene Cluster 3. Type = terpene. Location: 577100 - 598315 nt.    | SCP_0201800 | 587099     | 588315   | +      | SMCOG1052:Terpene_synthase/cyclase_metal-binding_domain_protein |             |
| contig_000001F - Gene Cluster 4. Type = other. Location: 1226000 - 1279843 nt.    | SCP_0203810 | 1245999    | 1259843  | -      | SMCOG1002:AMP-dependent_synthetase_and_ligase                   |             |
| contig_000002F - Gene Cluster 5. Type = terpene. Location: 1420916 - 1442540 nt.  | SCP_0304660 | 1430915    | 1432540  | +      | SMCOG1052:Terpene_synthase/cyclase_metal-binding_domain_protein |             |
| contig_000002F - Gene Cluster 6. Type = t1pks. Location: 1903728 - 1956364 nt.    | SCP_0306490 | 1932910    | 1936364  | +      | SMCOG1002:AMP-dependent_synthetase_and_ligase                   |             |
|                                                                                   | SCP_0306480 | 1923727    | 1930460  | -      | SMCOG1022:Beta-ketoacyl_synthase                                | EC:3.1      |
| contig_000002F - Gene Cluster 7. Type = terpene. Location: 2394718 - 2415961 nt.  | SCP_0308030 | 2404717    | 2405961  | -      | SMCOG1052:Terpene_synthase/cyclase_metal-binding_domain_protein |             |
| contig_000003F - Gene Cluster 8. Type = terpene. Location: 780278 - 801362 nt.    | SCP_0403040 | 790277     | 791362   | -      | SMCOG1052:Terpene_synthase/cyclase_metal-binding_domain_protein |             |
| contig_000003F - Gene Cluster 9. Type = terpene. Location: 1471027 - 1501332 nt.  | SCP_0405790 | 1490111    | 1491332  | +      | TRI5                                                            | EC:4.2.3.6  |
|                                                                                   | SCP_0405760 | 1481026    | 1482251  | +      | TRI5                                                            | EC:4.2.3.6  |
| contig_000003F - Gene Cluster 10. Type = terpene. Location: 1523295 - 1544372 nt. | SCP_0405960 | 1533294    | 1534372  | -      | TRI5                                                            | EC:4.2.3.6  |
| contig_000004F - Gene Cluster 11. Type = other. Location: 2837290 - 2881205 nt.   | SCP_0509750 | 2857289    | 2861205  | -      | SMCOG1002:AMP-dependent_synthetase_and_ligase                   |             |
| contig_000005F - Gene Cluster 12. Type = indole. Location: 730480 - 752441 nt.    | SCP_0602770 | 740479     | 742441   | -      | indole_PTase                                                    | EC:2.5.1    |
| contig_000005F - Gene Cluster 13. Type = terpene. Location: 1217614 - 1239213 nt. | SCP_0604400 | 1227613    | 1229213  | +      | SMCOG1052:Terpene_synthase/cyclase_metal-binding_domain_protein |             |
| contig_000005F - Gene Cluster 14. Type = other. Location: 1681418 - 1725375 nt.   | SCP_0605700 | 1701417    | 1705375  | +      | SMCOG1002:AMP-dependent_synthetase_and_ligase                   |             |
| contig_000006F - Gene Cluster 15. Type = terpene. Location: 344484 - 365726 nt.   | SCP_0701300 | 354483     | 355726   | -      | phytoene_synt                                                   | EC:2        |
| contig_000007F - Gene Cluster 16. Type = terpene. Location: 1818743 - 1839963 nt. | SCP_0806170 | 1828742    | 1829963  | +      | SMCOG1052:Terpene_synthase/cyclase_metal-binding_domain_protein |             |
| contig_000008F - Gene Cluster 17. Type = terpene. Location: 106419 - 130408 nt.   | SCP_0900460 | 119213     | 120408   | +      | TRI5                                                            | EC:4.2.3.6  |
|                                                                                   | SCP_0900450 | 116418     | 117708   | +      | TRI5                                                            | EC:4.2.3.6  |
| contig_000008F - Gene Cluster 18. Type = other. Location: 882452 - 926420 nt.     | SCP_0903030 | 902451     | 906420   | -      | SMCOG1002:AMP-dependent_synthetase_and_ligase                   |             |
| contig_000008F - Gene Cluster 19. Type = terpene. Location: 1136595 - 1159210 nt. | SCP_0903760 | 1146594    | 1149210  | +      | terpene_cyclase                                                 | EC:5.4      |
| contig_000008F - Gene Cluster 20. Type = terpene. Location: 1472478 - 1494300 nt. | SCP_0905140 | 1482477    | 1484300  | -      | phytoene_synt                                                   | EC:2.5.1.21 |

|                                                                                       |             |         |           |                                                                 |              |
|---------------------------------------------------------------------------------------|-------------|---------|-----------|-----------------------------------------------------------------|--------------|
| contig_000011F - Gene Cluster 21. Type = other. Location: 351494 - 398797 nt.         | SCP_1101170 | 365576  | 368220 -  | SMCOG1002:AMP-dependent_synthetase_and_ligase                   |              |
|                                                                                       | SCP_1101190 | 371493  | 378797 -  | SMCOG1127:condensation_domain-containing_protein                | EC:1.2.1.31  |
|                                                                                       | SCP_1101230 | 385659  | 387304 +  | SMCOG1010:NAD-dependent_epimerase/dehydratase                   | EC:1.1.1.145 |
|                                                                                       | SCP_1101200 | 379431  | 380563 -  | SMCOG1030:serine/threonine_protein_kinase                       |              |
|                                                                                       | SCP_1101160 | 363311  | 364787 +  | SMCOG1030:serine/threonine_protein_kinase                       |              |
| contig_000010F - Gene Cluster 22. Type = t1pks. Location: 885689 - 934146 nt.         | SCP_1203090 | 905688  | 914146 +  | SMCOG1022:Beta-ketoacyl_synthase                                |              |
| contig_000010F - Gene Cluster 23. Type = indole-nrps. Location: 1041798 - 1097259 nt. | SCP_1203670 | 1081255 | 1083237 - | SMCOG1034:cytochrome_P450                                       | EC:1.14      |
|                                                                                       | SCP_1203620 | 1061797 | 1063417 - | dmat                                                            | EC:2.5.1     |
|                                                                                       | SCP_1203640 | 1067899 | 1077259 - | SMCOG1002:AMP-dependent_synthetase_and_ligase                   |              |
|                                                                                       | SCP_1203600 | 1055515 | 1057744 - | SMCOG1034:cytochrome_P450                                       | EC:1.14      |
| contig_000012F - Gene Cluster 24. Type = terpene. Location: 174101 - 201152 nt.       | SCP_1300670 | 190035  | 191152 +  | SMCOG1052:Terpene_synthase/cyclase_metal-binding_domain_protein |              |
|                                                                                       | SCP_1300680 | 191672  | 193134 -  | SMCOG1036:alpha/beta_hydrolase_fold_protein                     | EC:2.3.1     |
|                                                                                       | SCP_1300650 | 184100  | 185284 +  | SMCOG1052:Terpene_synthase/cyclase_metal-binding_domain_protein |              |
| contig_000013F - Gene Cluster 25. Type = terpene. Location: 466945 - 488536 nt.       | SCP_1401670 | 476944  | 478536 -  | SMCOG1052:Terpene_synthase/cyclase_metal-binding_domain_protein |              |
| contig_000014F - Gene Cluster 26. Type = terpene. Location: 887958 - 909591 nt.       | SCP_1503070 | 897957  | 899591 -  | SMCOG1052:Terpene_synthase/cyclase_metal-binding_domain_protein |              |
| contig_000015F - Gene Cluster 27. Type = t1pks. Location: 462780 - 507320 nt.         | SCP_1601610 | 464481  | 466711 +  | SMCOG1034:cytochrome_P450                                       | EC:1.14      |
| contig_000016F - Gene Cluster 28. Type = other. Location: 119822 - 164105 nt.         | SCP_1601690 | 482779  | 487320 +  | SMCOG1022:Beta-ketoacyl_synthase                                | EC:3.1       |
|                                                                                       | SCP_1700600 | 139821  | 144105 +  | SMCOG1002:AMP-dependent_synthetase_and_ligase                   |              |
| contig_000016F - Gene Cluster 29. Type = t1pks. Location: 567660 - 616617 nt.         | SCP_1702150 | 598219  | 599487 +  | SMCOG1036:alpha/beta_hydrolase_fold_protein                     |              |
|                                                                                       | SCP_1702140 | 587659  | 596617 +  | SMCOG1022:Beta-ketoacyl_synthase                                |              |
| contig_000016F - Gene Cluster 30. Type = t1pks. Location: 678964 - 727930 nt.         | SCP_1702470 | 678174  | 680138 -  | SMCOG: SMC0G1030 (serine/threonine protein kinase )             |              |
|                                                                                       | SCP_1702560 | 698963  | 707930 -  | SMCOG1022:Beta-ketoacyl_synthase                                |              |
